# Supplementary material
Source: PubMed Central journal article supplement (PMC7097514)
Supplement: 41587_2019_225_MOESM1_ESM.pdf [file 41587_2019_225_MOESM1_ESM.pdf]

In the format provided by the authors and unedited.

# Precision mouse models with expanded tropism for human pathogens

Angela Wahl<sup>1\*</sup>, Chandrav De<sup>1,10</sup>, Maria Abad Fernandez<sup>2,10</sup>, Erik M. Lenarcic<sup>2,3</sup>, Yinyan Xu<sup>2</sup>, Adam S. Cockrell<sup>4</sup>, Rachel A. Cleary<sup>1</sup>, Claire E. Johnson<sup>1</sup>, Nathaniel J. Schramm<sup>1</sup>, Laura M. Rank<sup>2</sup>, Isabel G. Newsome<sup>5</sup>, Heather A. Vincent<sup>2,3</sup>, Wes Sanders<sup>2,3</sup>, Christian R. Aguilera-Sandoval<sup>1,9</sup>, Allison Boone<sup>2,6</sup>, William H. Hildebrand<sup>7</sup>, Paul A. Dayton<sup>5</sup>, Ralph S. Baric<sup>2,4</sup>, Raymond J. Pickles<sup>2,6</sup>, Miriam Braunstein<sup>2</sup>, Nathaniel J. Moorman<sup>2,3</sup>, Nilu Goonetilleke<sup>2,8</sup> and J. Victor Garcia<sup>1\*</sup>

<sup>1</sup>Division of Infectious Diseases, International Center for the Advancement of Translational Science, Center for AIDS Research, University of North Carolina, School of Medicine, Chapel Hill, NC, USA. <sup>2</sup>Department of Microbiology and Immunology, University of North Carolina, Chapel Hill, NC, USA.

<sup>3</sup>Lineberger Comprehensive Cancer Center, University of North Carolina, Chapel Hill, NC, USA. <sup>4</sup>Department of Epidemiology, University of North Carolina, Chapel Hill, NC, USA. <sup>5</sup>Joint Department of Biomedical Engineering, University of North Carolina and North Carolina State University, Chapel Hill, NC, USA. <sup>6</sup>Marsico Lung Institute, University of North Carolina, Chapel Hill, NC, USA. <sup>7</sup>Department of Microbiology and Immunology, University of Oklahoma Health Sciences Center, Oklahoma City, OK, USA. <sup>8</sup>UNC HIV Cure Center, University of North Carolina, Chapel Hill, NC, USA. <sup>9</sup>Present address: BD Life Sciences, San Jose, CA, USA. <sup>10</sup>These authors contributed equally: Chandrav De, Maria Abad Fernandez. \*e-mail: [angela\\_wahl@med.unc.edu](mailto:angela_wahl@med.unc.edu); [victor\\_garcia@med.unc.edu](mailto:victor_garcia@med.unc.edu)

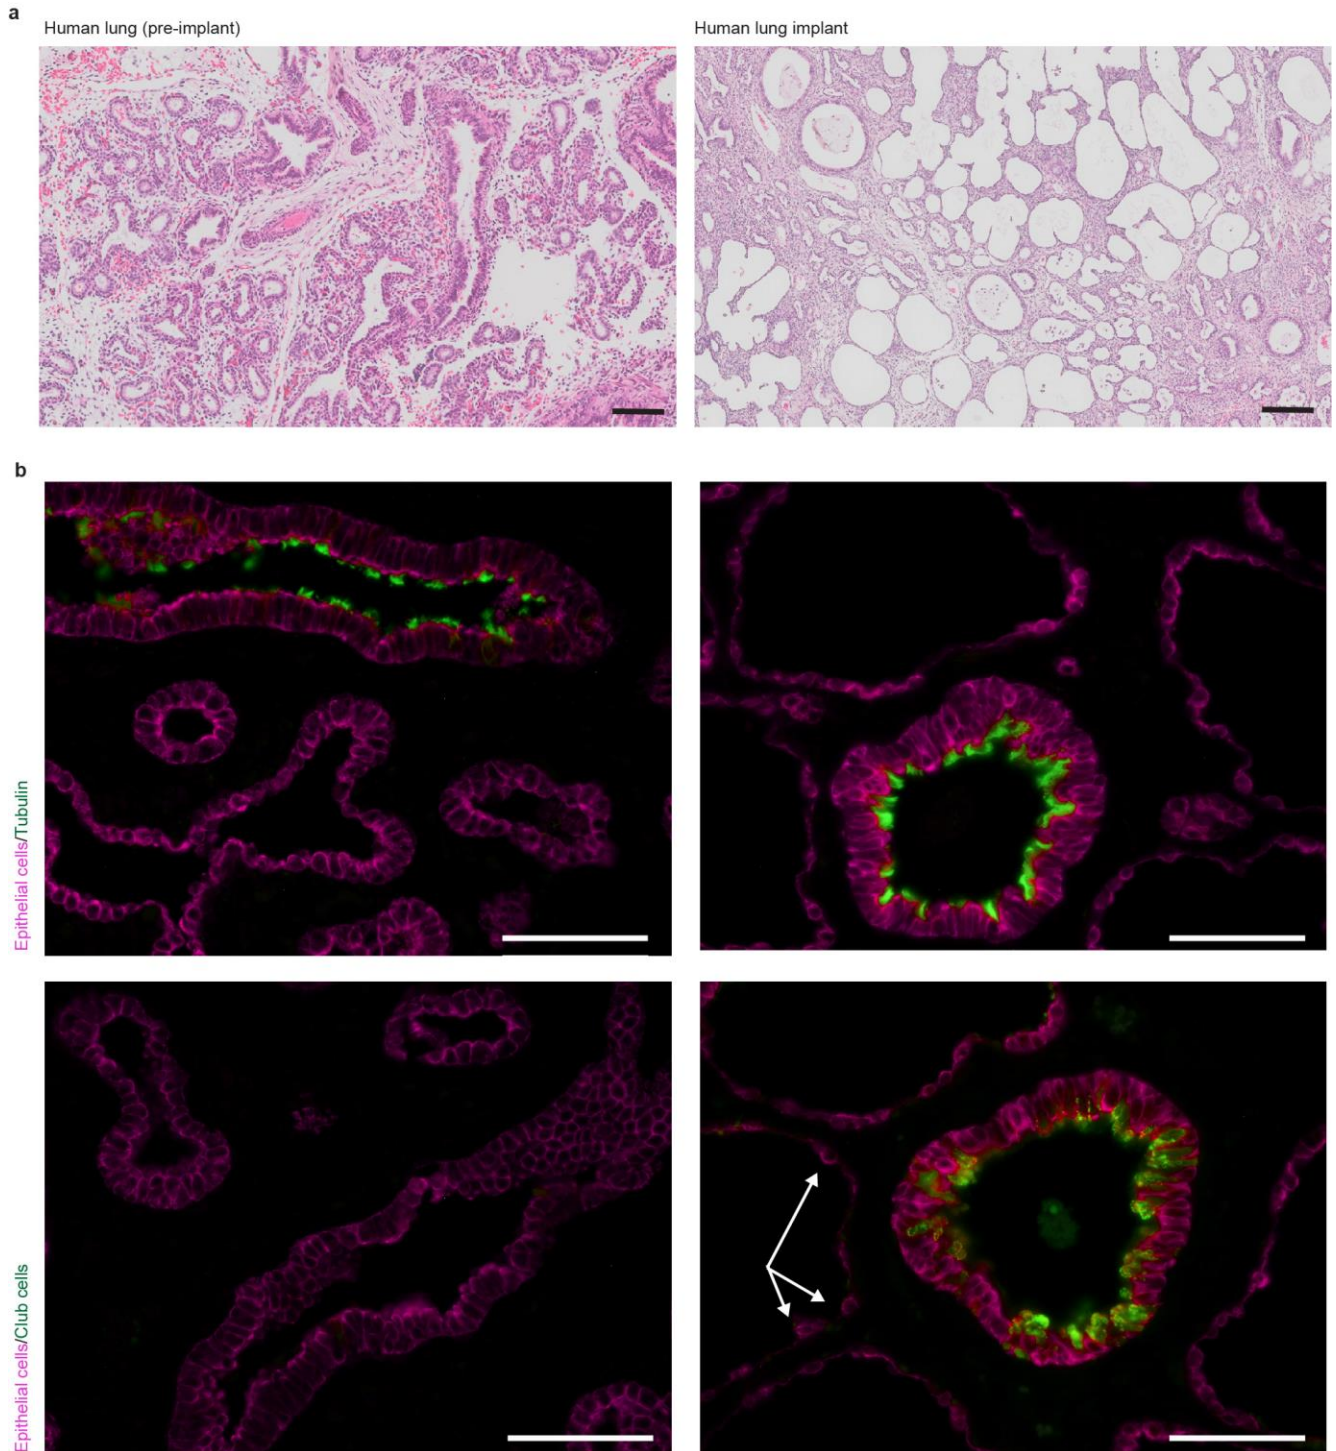

**Supplementary Figure 1**

Histological analysis of the structure and cellular composition of donor matched human lung tissue pre- and post-implantation.

The structure and cellular composition of human lung tissue pre-implantation (n=2 analyzed) and donor matched LoM lung implant harvested 2 months post-implantation (n=4 analyzed) were analyzed by (a) H&E and (b) immunofluorescent staining. In b, co-staining was performed for epithelial cells (cytokeratin 19, magenta) and cilia (alpha-acetylated tubulin, green) or club cells (CC10, green). Arrows show cuboidal cells lining alveoli. In a, scale bars are 100  $\mu$ m (left panel) and 200  $\mu$ m (right panel). In b, scale bars are 200  $\mu$ m (left panels) and 100  $\mu$ m (right panels).

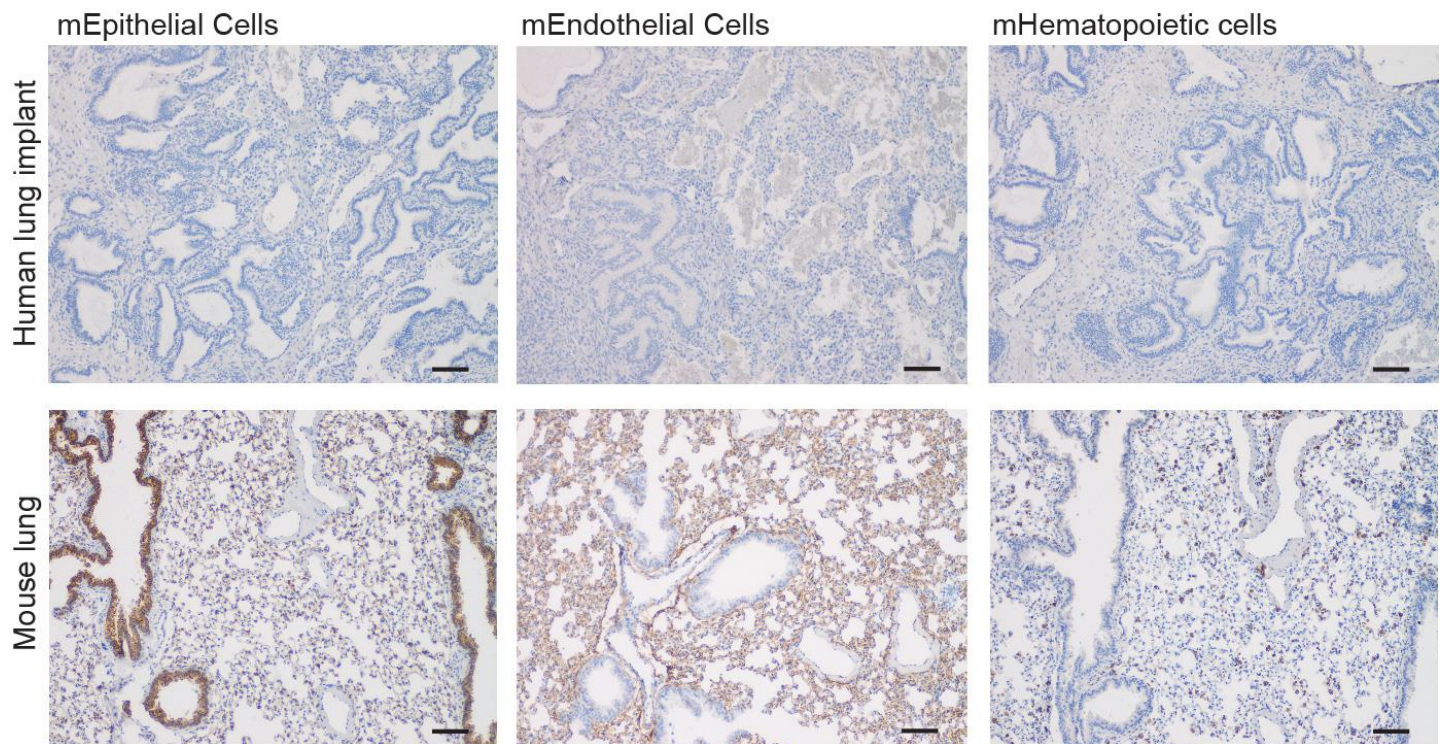

### Supplementary Figure 2

Presence of mouse cells in the human lung implants of LoM and NSG mouse lung.

Immunohistochemical staining for murine epithelial cells, endothelial cells, hematopoietic cells in LoM human lung implants (n=3 analyzed, top panels) and the mouse lung (n=1 analyzed, bottom panels). Images: 10X, scale bars: 100  $\mu$ m, positive cells: brown.

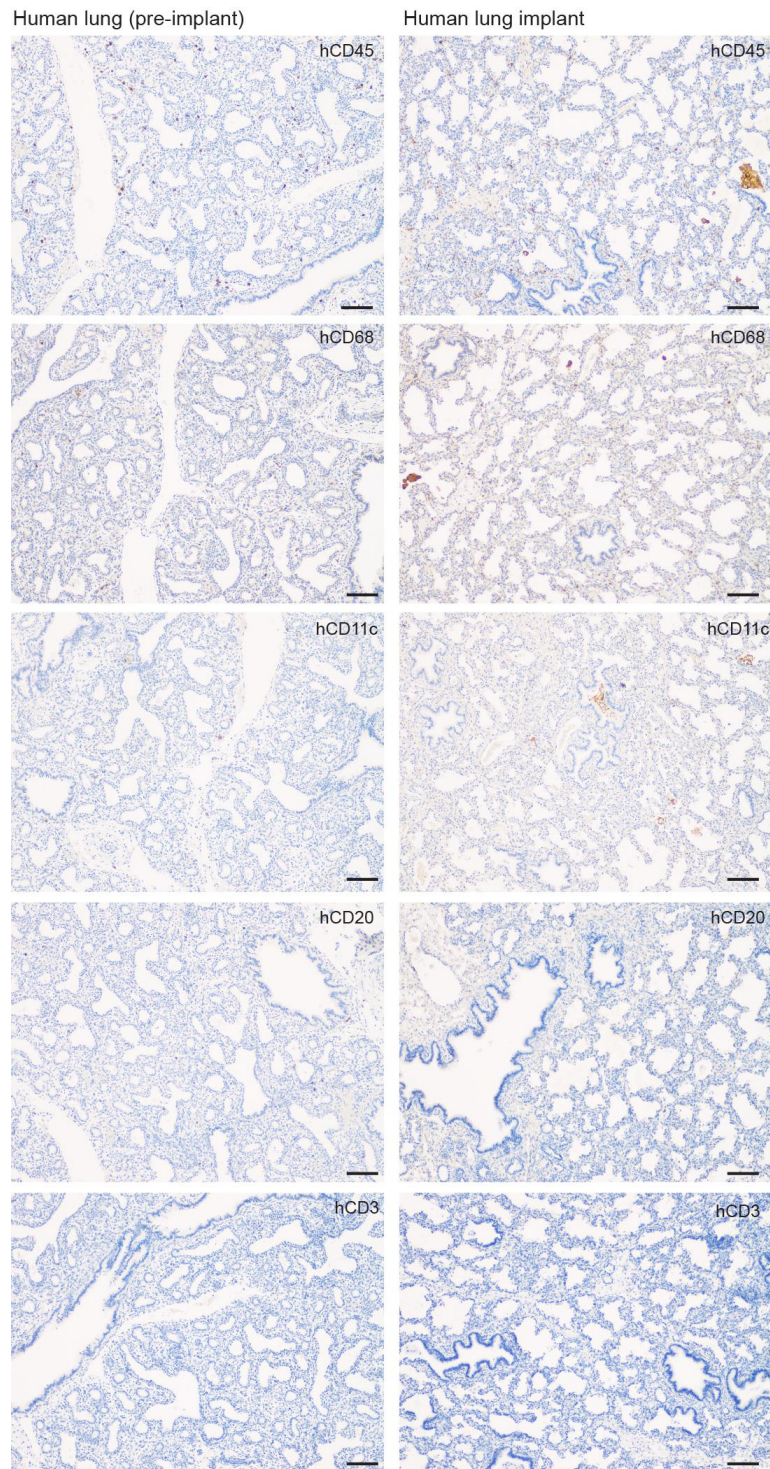

### Supplementary Figure 3

Presence of human immune cells in human lung tissue pre- and post-implantation.

Immunohistochemical staining for human hematopoietic (hCD45) cells including macrophages (hCD68), dendritic cells (hCD11c), B cells (hCD20) and T cells (hCD3) in human donor matched lung tissue pre-implantation (n=1 analyzed, left panels) and two months post-implantation (n=1 analyzed, right panels). Images: 10X, scale bars: 100  $\mu$ m, positive cells: brown.

| Gene   | Expression | Gene2 | Expression2 | Gene3  | Expression3 | Gene4  | Expression4 |
|--------|------------|-------|-------------|--------|-------------|--------|-------------|
| RL1    |            | UL38  | 2.38        | UL92   | 2.56        | UL148A |             |
| RL8A   |            | UL40  | 18.23       | UL93   | 13.97       | UL148B |             |
| RL9A   | 11.98      | UL41A |             | UL94   | 2           | UL148C |             |
| RL10   |            | UL42  | 9.96        | UL95   |             | UL148D |             |
| RL11   |            | UL43  | 9.23        | UL96   | 6.08        | UL150  | 10.78       |
| RL12   |            | UL44  | 10.88       | UL97   | 3.9         | UL150A | 8.88        |
| RL13   |            | UL45  | 2.65        | UL98   | 11.52       | TRS1   |             |
| UL1    |            | UL46  | 2.08        | UL99   |             | US3    | 7.55        |
| UL2    |            | UL47  | 0.96        | UL100  |             | US6    |             |
| UL4    |            | UL48  | 14.89       | UL102  | 9.26        | US7    |             |
| UL5    | 6.74       | UL48A |             | UL103  | 3.2         | US8    | 8.7         |
| UL6    | 9.5        | UL49  | 8.1         | UL104  | 2.73        | US9    | 2.8         |
| UL7    |            | UL50  |             | UL105  | 9.12        | US10   | 11.25       |
| UL8    |            | UL51  |             | UL111A |             | US11   | 1.31        |
| UL9    |            | UL52  | 7.98        | UL112  | 8           | US12   | 2.24        |
| UL10   |            | UL53  | 4.43        | UL114  | 11.44       | US13   |             |
| UL11   |            | UL54  | 8.93        | UL115  | 2.61        | US14   | 3.85        |
| UL13   | 1.27       | UL55  | 13.07       | UL116  | 9.49        | US15   |             |
| UL14   | 9.87       | UL56  | 9.61        | UL117  | 1.7         | US16   |             |
| UL15A  | 5.35       | UL57  | 8.83        | UL119  |             | US17   | 8.03        |
| UL16   | 11.14      | UL69  | 11.33       | UL120  |             | US18   | 3.01        |
| UL17   |            | UL70  | 10.86       | UL121  | 4.8         | US19   | 8.43        |
| UL18   | 1.88       | UL71  | 2.57        | UL122  | 3.15        | US20   |             |
| UL19   |            | UL72  | 3.55        | UL123  | 0.93        | US21   | 3.14        |
| UL20   |            | UL73  |             | UL124  |             | US22   | 3.04        |
| UL21A  | 4.2        | UL74  | 2.29        | UL130  |             | US23   | 3.62        |
| UL21.5 | 18.31      | UL74A | 11.92       | UL131A |             | US24   | 1.18        |
| UL23   | 11.91      | UL75  | 7.29        | UL132  | 15.58       | US26   | 11.45       |
| UL24   | 3.77       | UL76  | 1.77        | UL133  |             | US27   | 2.53        |
| UL25   | 11.13      | UL77  |             | UL135  | 12.23       | US28   | 7.15        |
| UL26   |            | UL78  | 7.27        | UL136  |             | US29   | 1.96        |
| UL27   | 9.92       | UL79  | 4.31        | UL138  |             | US30   |             |
| UL29   | 8.53       | UL80  | 11.2        | UL139  | 17.54       | US31   | 3.89        |
| UL30   | 9.06       | UL82  | 12.17       | UL140  |             | US32   |             |
| UL30A  | 6.19       | UL83  | 10.75       | UL141  |             | US33A  |             |
| UL31   | 4.24       | UL84  | 12.72       | UL142  |             | US33A  |             |
| UL32   | 1.75       | UL85  | 4.23        | UL144  |             | US34   |             |
| UL33   | 6.72       | UL86  | 10.94       | UL145  | 4.71        | US34A  |             |
| UL34   | 1.87       | UL87  | 8.4         | UL146  |             |        |             |
| UL35   | 3.22       | UL88  | 7.03        | UL147  |             |        |             |
| UL36   | 8.81       | UL89  | 10.31       | UL147A |             |        |             |
| UL37   |            | UL91  | 10.65       | UL148  | 2.05        |        |             |

**Supplementary Figure 4**

In vivo gene expression profile of HCMV-infected LoM is consistent with lytic replication.

Total RNA was extracted from human lung implants harvested from HCMV TB40/E infected LoM 14 days post exposure (n=2 TB40/E infected implants). Double stranded cDNA ((ds)cDNA) was generated from ribosomal RNA (rRNA) depleted total RNA. HCMV (ds)cDNA was enriched with custom designed biotinylated probes spanning both strands of the entire HCMV genome and sequenced using next generation sequencing. High quality reads were aligned to the HCMV genome, and viral expression was quantified in read per kilobase per million (rpkm). Values show read counts per gene normalized to gene length read (rpkm).

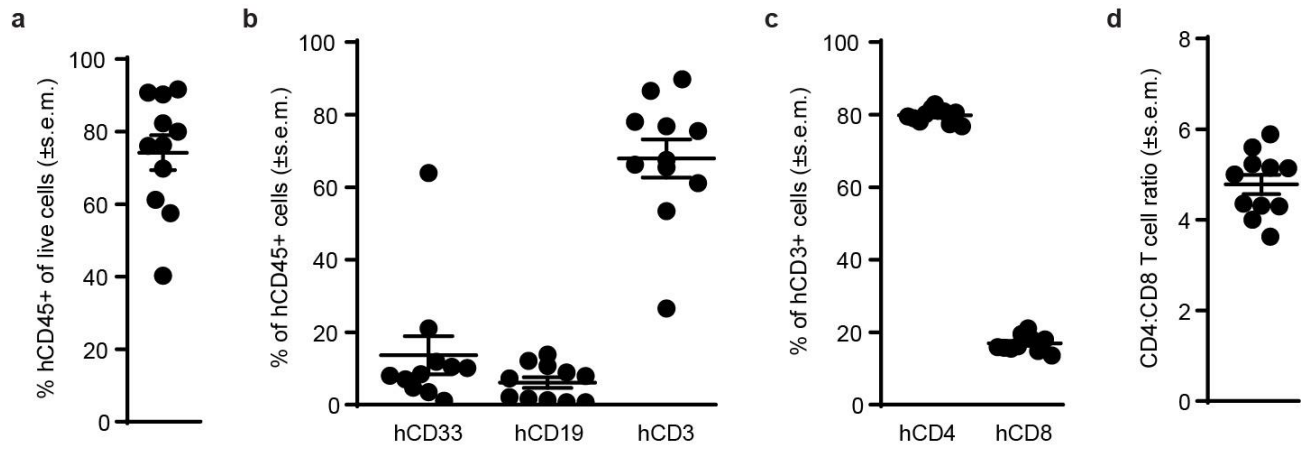

### Supplementary Figure 5

Reconstitution of the peripheral blood of BLT-L mice with human innate and adaptive immune cells.

Levels of (a) human hematopoietic cells (hCD45) including (b) human myeloid cells (hCD33), B cells (hCD19) and T cells (hCD3) as well as the (c) levels of CD4<sup>+</sup> (hCD4) and CD8<sup>+</sup> (hCD8) T cells and (d) ratio of human CD4:CD8 T cells in the peripheral blood of BLT-L mice (n=11, filled circles). Horizontal lines represent mean  $\pm$  s.e.m.

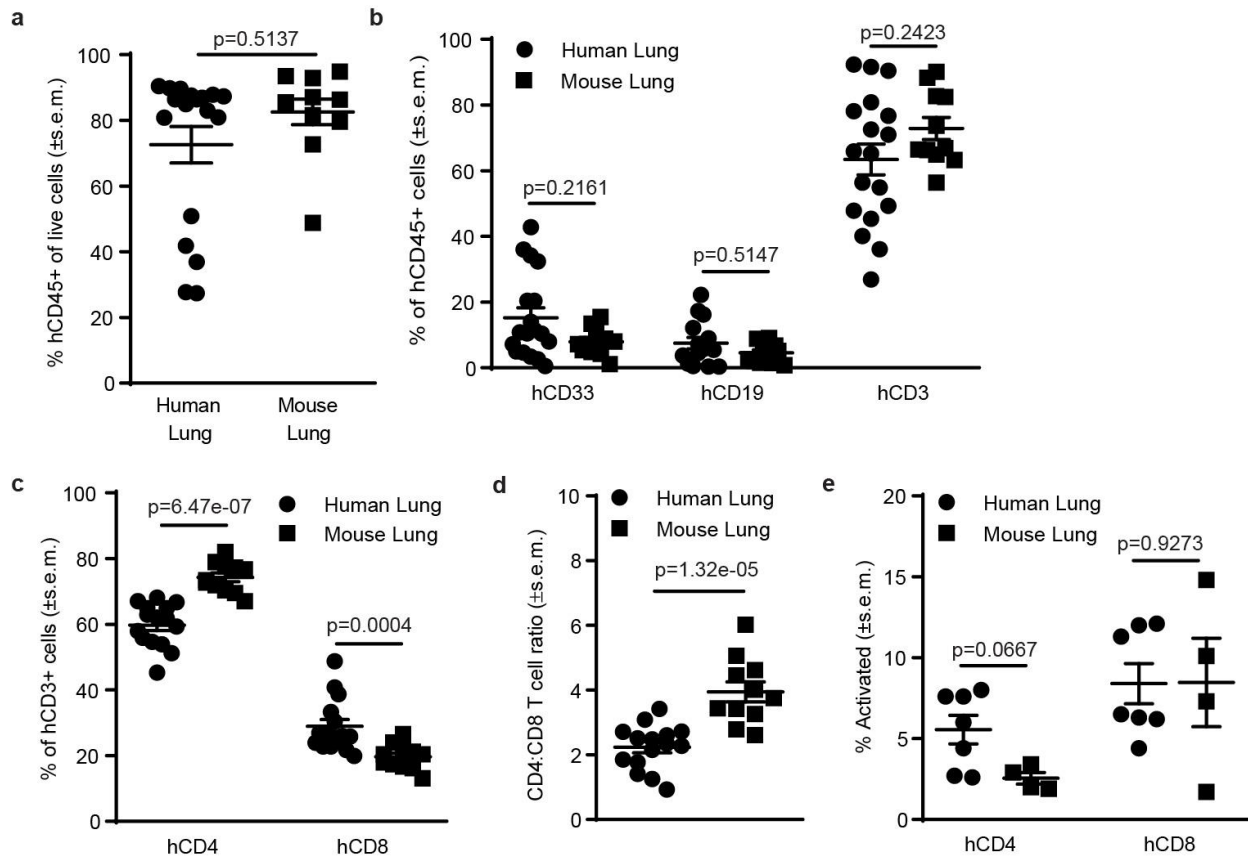

**Supplementary Figure 6**

Levels of human immune cells in the human lung implants and mouse lung of BLT-L mice.

Levels of (a) human hematopoietic cells (hCD45) including (b) human myeloid cells (hCD33), B cells (hCD19) and T cells (hCD3) in the human lung implants (circles; hCD45, hCD33, and hCD3  $n=18$ , hCD19  $n=15$ ) and mouse lung (squares,  $n=11$ ) of BLT-L mice. (c) Levels of CD4<sup>+</sup> (hCD4) and CD8<sup>+</sup> (hCD8) T cells and (d) ratio of human CD4:CD8 T cells in the human lung implants (circles,  $n=15$ ) and mouse lungs (squares,  $n=11$ ) of BLT-L mice. (e) Human CD4<sup>+</sup> and CD8<sup>+</sup> T cell activation (CD38<sup>+</sup>HLA-DR<sup>+</sup>) levels in the human lung implant (circles,  $n=7$ ) and mouse lung (squares,  $n=4$ ) of BLT-L mice. Horizontal lines represent mean  $\pm$  s.e.m. Human immune cell levels in the human lung implants and mouse lung were compared with a two-tailed Mann-Whitney test.

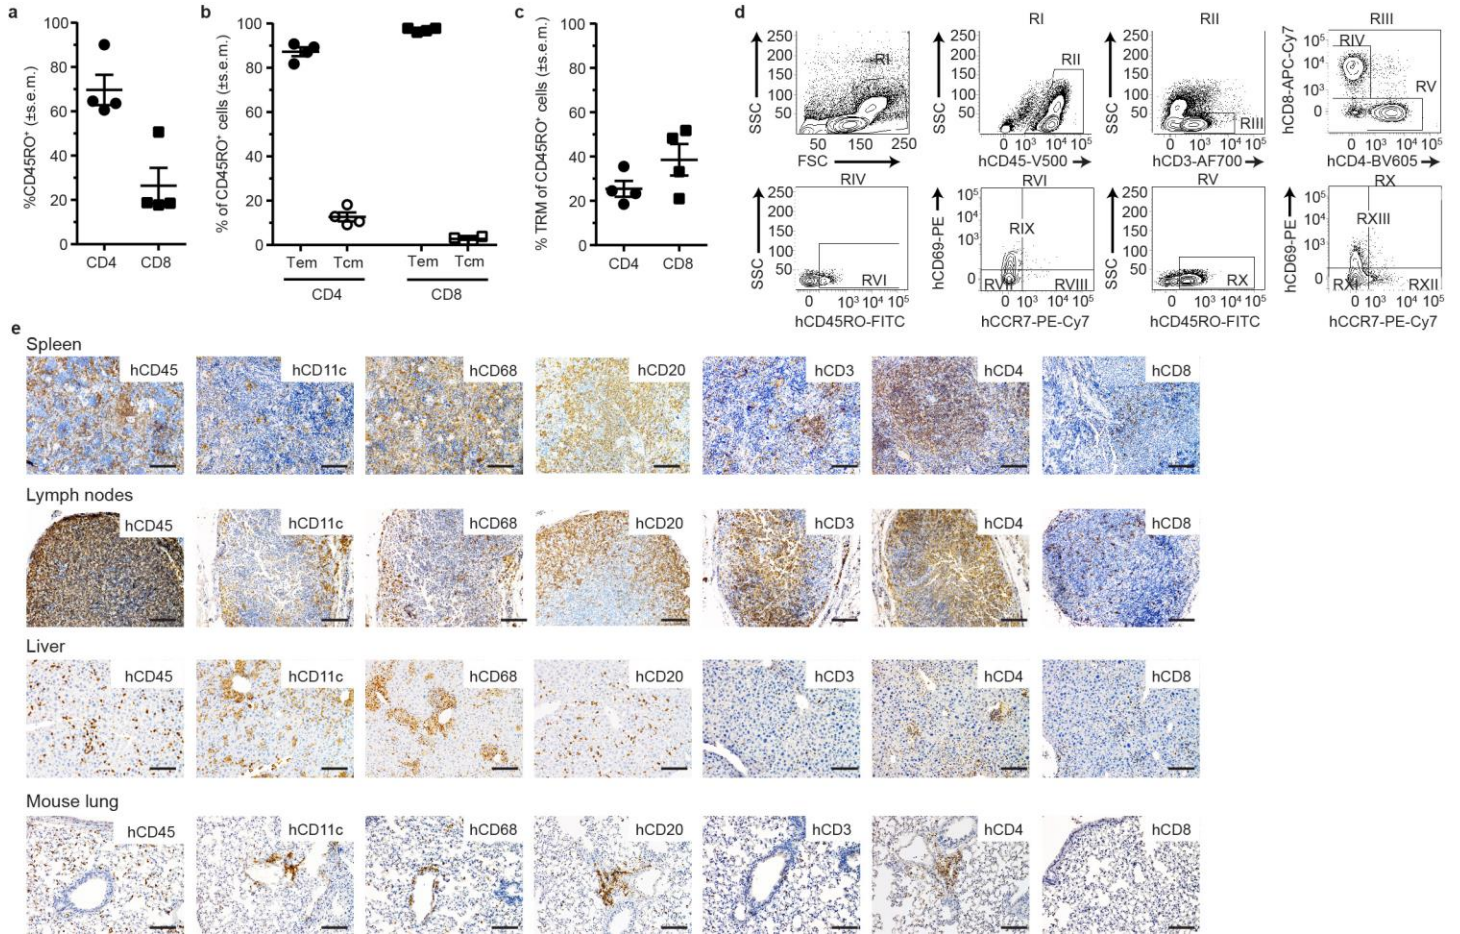

**Supplementary Figure 7**

Systemic presence of human immune cells in BLT-L mice.

(a-c) The memory phenotype of human T cells in the human lung implants of BLT-L mice ( $n=4$  BLT-L mice, one lung implant per animal). (a) Percent of CD4<sup>+</sup> (filled circles) and CD8<sup>+</sup> (filled squares) human T cells expressing a memory phenotype (CD45RO<sup>+</sup>). (b) Percent of memory (CD45RO<sup>+</sup>) CD4<sup>+</sup> (circles) and CD8<sup>+</sup> (squares) human T cells expressing an effector memory (Tem, CCR7<sup>neg</sup>, closed symbols) or central memory (Tcm, CCR7<sup>+</sup>, open symbols) phenotype. (c) Percent of memory (CD45RO<sup>+</sup>) CD4<sup>+</sup> (filled circles) and CD8<sup>+</sup> (filled squares) T cells that are tissue-resident (TRM, CD69<sup>+</sup>). (d) Flow cytometry gating scheme. Regions identify the following human cell populations: RI (live cells), RII (human hematopoietic cells), RIII (T cells), RIV (CD8<sup>+</sup> T cells), RV (CD4<sup>+</sup> T cells), RVI (memory CD8<sup>+</sup> T cells), RVII (CD8<sup>+</sup> Tem), RVIII (CD8<sup>+</sup> Tcm), RIX (CD8<sup>+</sup> TRM), RX (memory CD4<sup>+</sup> T cells), RXI (CD4<sup>+</sup> Tem), RXII (CD4<sup>+</sup> Tcm) and RXIII (CD4<sup>+</sup> TRM). In a-c, horizontal lines represent mean  $\pm$  s.e.m. (e) Human hematopoietic (hCD45) cells including dendritic cells (hCD11c), macrophages (hCD68), B cells (hCD20) and T cells (hCD3, hCD4 and hCD8) in lymphoid (spleen and lymph nodes) and non-lymphoid (liver and mouse lung) of BLT-L mice by immunohistochemical staining (positive cells: brown). Images shown are at 20X magnification and represent three BLT-L mice (scale bars: 100  $\mu$ m).

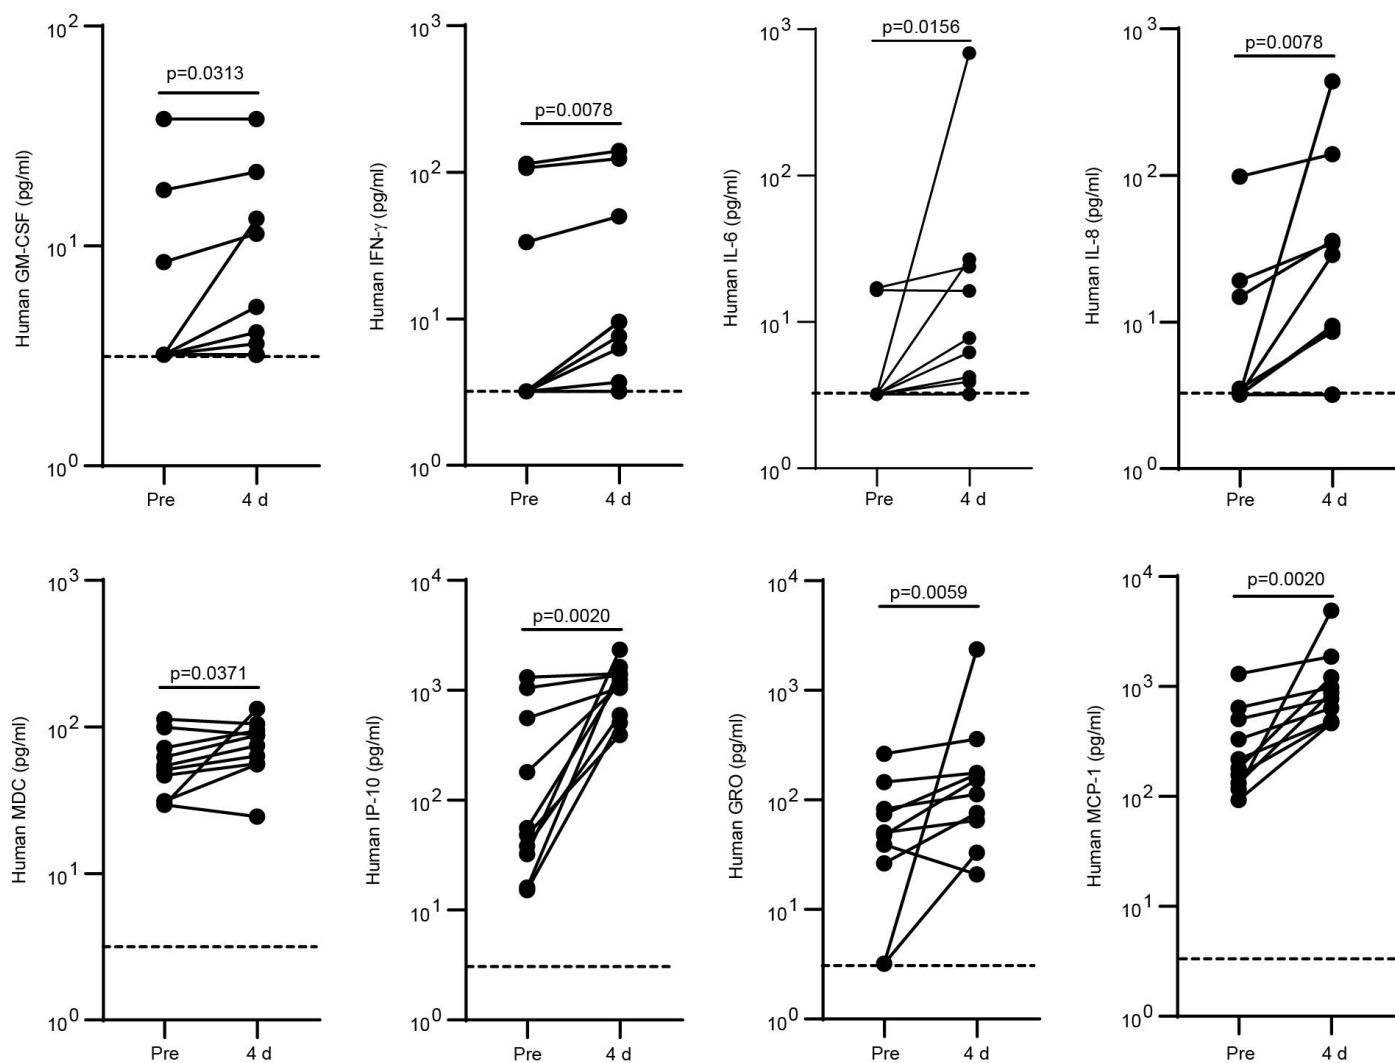

**Supplementary Figure 8**

Increased plasma human cytokine and chemokine levels in BLT-L mice following HCMV exposure.

Levels of human GM-CSF IFN- $\gamma$ , IL-6, IL-8, MDC, IP-10, GRO and MCP-1 in the PB plasma of BLT-L mice (n=10 mice, filled circles) pre and 4 days after HCMV TB40/E inoculation. A value of 3.2 pg/ml was graphed for measurements below the limit of detection of the assay (3.2 pg/ml, shown with a dashed line). Human cytokine and chemokine levels pre and post HCMV inoculation were compared with a two-tailed Wilcoxon matched-pairs signed rank test.

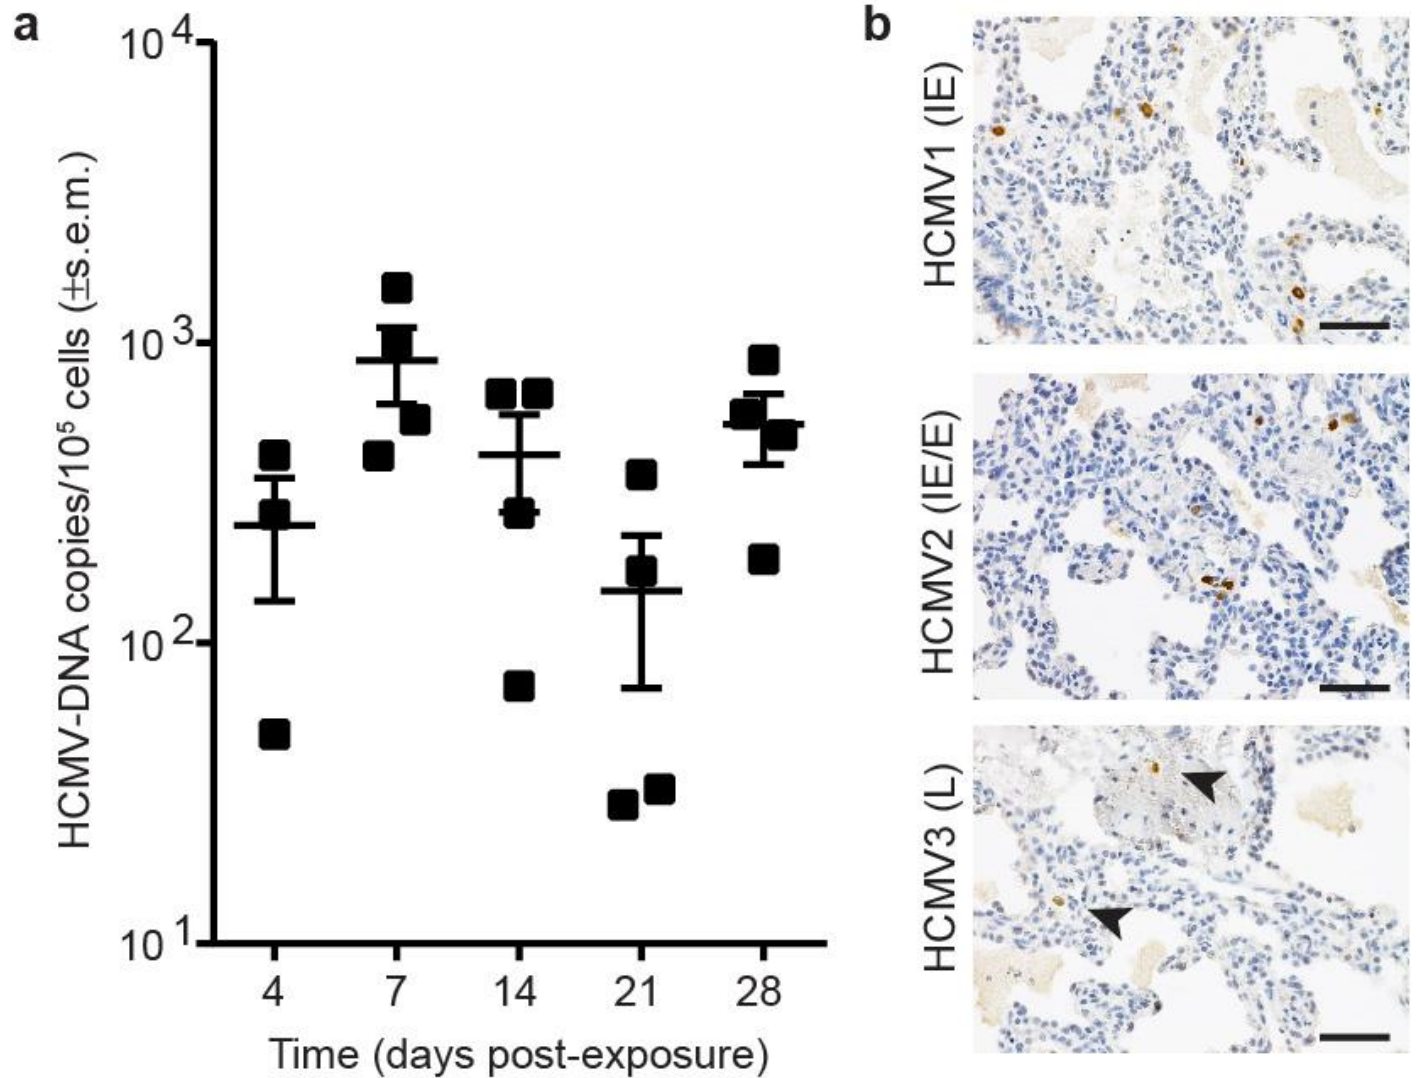

**Supplementary Figure 9**

In vivo replication of HCMV AD169 in LoM human lung implants.

(a) HCMV-DNA levels in LoM human lung implants at 4, 7, 14, 21 and 28 days post AD169 exposure (day 4: n=3 implants, days 7, 14, 21 and 28: n=4 implants, filled squares). Horizontal lines represent mean  $\pm$  s.e.m. (b) HCMV immediate early (IE), early (E) and late (L) proteins in the human lung implant of an AD169-infected LoM 21 days post-exposure (n=1 lung implant analyzed, positive cells: brown). Images shown are at 40X magnification (scale bars: 50  $\mu$ m). Positive cells in the bottom panel are indicated with black arrows.

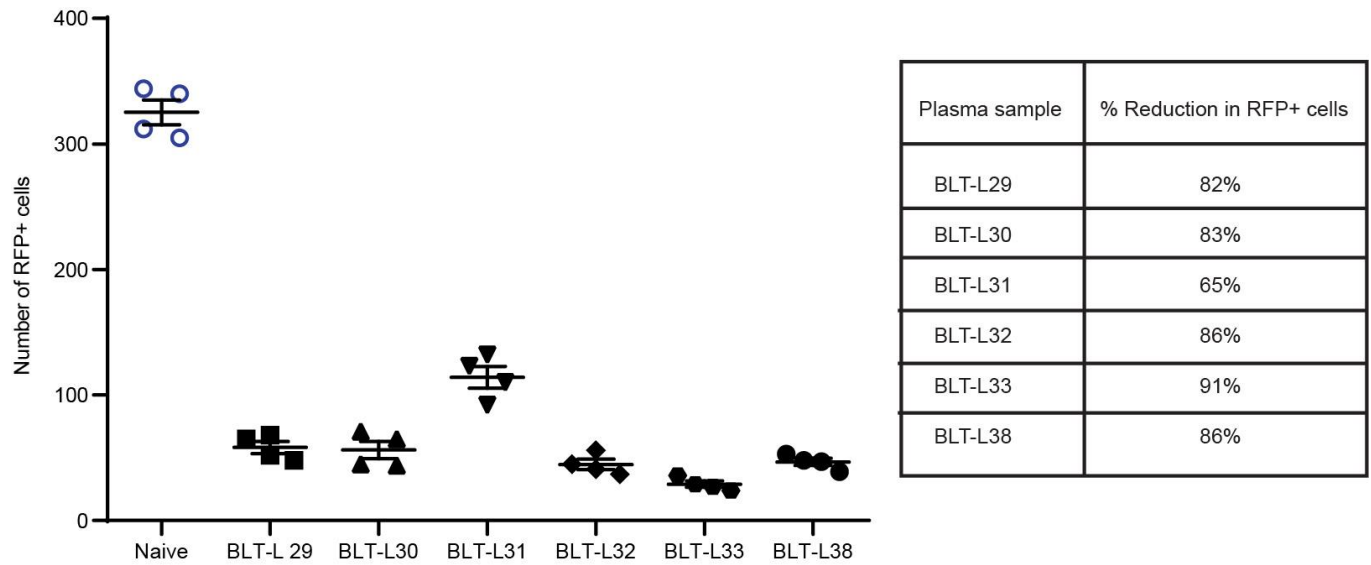

#### Supplementary Figure 10

Plasma of HCMV-exposed BLT-L mice contains HCMV neutralizing activity.

Heat-inactivated plasma from naïve (n=1, open blue circles) and repeatedly HCMV TB40/E exposed BLT-L mice (n=6, filled symbols) was incubated with HCMV TB40/E expressing RFP for 1 h prior to the addition of virus to epithelial cells (ARPE-19). Epithelial cells were incubated at 37°C with the virus/plasma mixture for 2 h at which time the virus/plasma mixture was removed and fresh media added. Shown is the number of HCMV TB40/E-RFP+ epithelial cells 72 h post-infection in quadruplicate wells. Horizontal lines represent mean  $\pm$  s.e.m. The percent reduction in TB40/E RFP+ cells compared to wells infected with HCMV pre-treated with naïve control plasma is shown in the table.

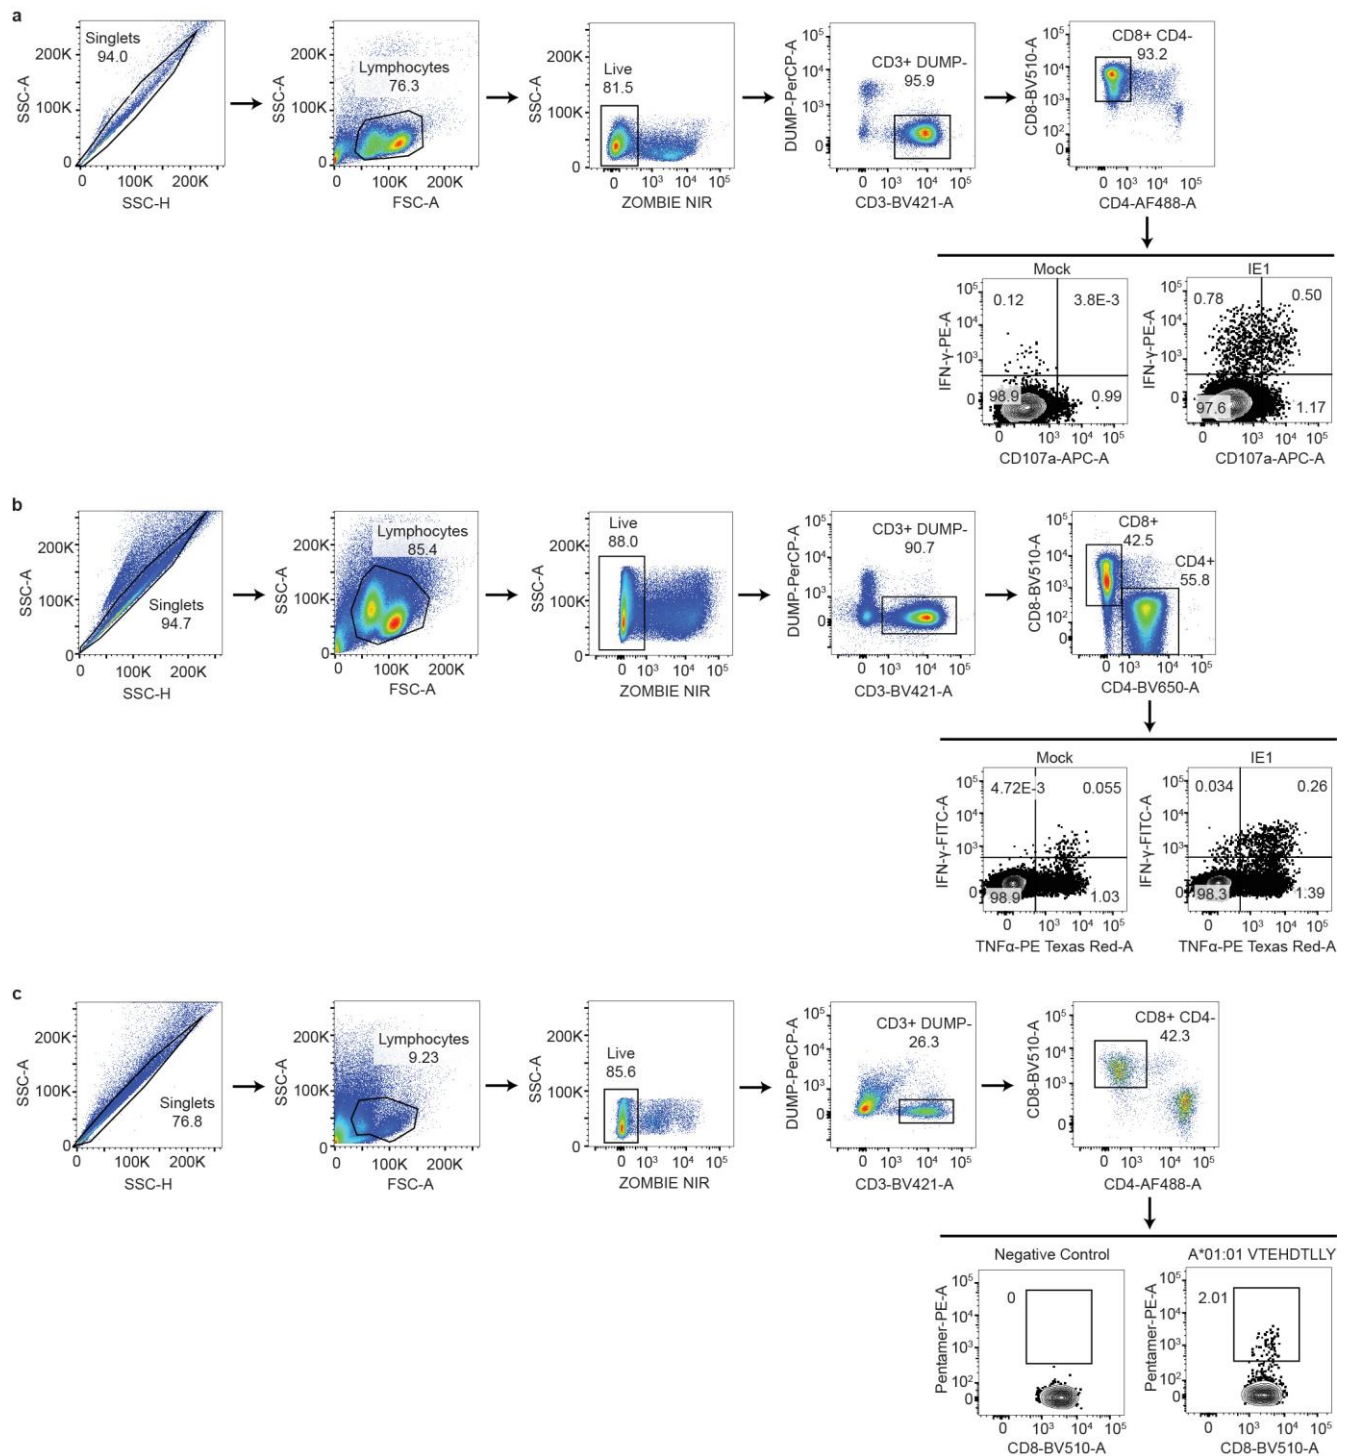

**Supplementary Figure 11**

Gating strategies for the identification of HCMV-specific human T cell responses in BLT-L mice by intracellular cytokine staining (ICS) and pentamer staining.

Representative flow cytometry plots indicating the gating used to detect (a) human CD8<sup>+</sup> T cells expressing IFN-γ and CD107a and (b) human CD4<sup>+</sup> T cells expressing IFN-γ and TNFα by ICS. (c) Representative flow cytometry plots indicating the gating strategy used to detect HLA class1a-restricted HCMV-specific human CD8<sup>+</sup> T cells by pentamer staining.

**Supplementary Table 1: LoM human lung implant cell production of human cytokines and chemokines following *ex vivo* LPS stimulation**

| Cytokine/chemokine | Human cytokine/chemokine levels (pg/ml) <sup>a</sup> |                  |
|--------------------|------------------------------------------------------|------------------|
|                    | Control                                              | LPS <sup>b</sup> |
| sCD40L             | 3.3 (±0.1)                                           | 3.4 (±0.2)       |
| Eotaxin            | 11 (±0.1)                                            | 11.7 (±0.4)      |
| FGF-2              | 11.6 (±1.5)                                          | 9.4 (±1.8)       |
| Flt-3L             | 6.5 (±0.7)                                           | 6.7 (±0.8)       |
| Fractalkine        | 38.9 (±3.1)                                          | 40.4 (±3.8)      |
| G-CSF              | 99.4 (±6.8)                                          | 1,436 (±588.5)   |
| GM-CSF             | 21.3 (±5.6)                                          | 47.3 (±5.9)      |
| GRO                | 8,610 (±1,523)                                       | 11,479 (±1,577)  |
| IFN-alpha2         | 8.7 (±1.6)                                           | 8.1 (±1.2)       |
| IFN-gamma          | <LOD                                                 | 3.3 (±0.06)      |
| IL-1alpha          | <LOD                                                 | <LOD             |
| IL-1beta           | <LOD                                                 | <LOD             |
| IL-1RA             | 4.6 (±0.6)                                           | 4.7 (±0.7)       |
| IL-2               | <LOD                                                 | <LOD             |
| IL-3               | <LOD                                                 | <LOD             |
| IL-4               | 56.9 (±2.7)                                          | 71.3 (±2.5)      |
| IL-5               | <LOD                                                 | <LOD             |
| IL-6               | 248.9 (±1.5)                                         | 538.9 (±101.3)   |
| IL-7               | 11.9 (±0.9)                                          | 16.2 (±1.2)      |
| IL-8               | 25,466 (±2,919)                                      | 23,919 (±3,150)  |
| IL-9               | <LOD                                                 | <LOD             |
| IL-10              | <LOD                                                 | 3.8 (±0.2)       |
| IL-12p40           | 4.8 (±0.5)                                           | 6.9 (±0.9)       |
| IL-12p70           | <LOD                                                 | <LOD             |
| IL-13              | 3.4 (±0.2)                                           | 4.8 (±0.7)       |
| IL-15              | <LOD                                                 | <LOD             |
| IL-17A             | <LOD                                                 | <LOD             |
| IP-10              | 29.9 (±1.1)                                          | 29.6 (±1.0)      |
| MCP-1              | 507.9 (±159.1)                                       | 1,277 (±481.2)   |
| MCP-3              | 6.7 (±0.7)                                           | 7.8 (±0.7)       |
| MDC                | 13.6 (±1.3)                                          | 21.1 (±0.8)      |
| MIP-1alpha         | 4.1 (±0.1)                                           | 8 (±1.7)         |
| MIP-1beta          | 5 (±0.1)                                             | 7 (±1.2)         |
| PDGF-AA            | 71.4 (±1.9)                                          | 73.8 (±4.4)      |
| PDGF-AB/BB         | 34.7 (±4.5)                                          | 39.2 (±4.65)     |
| RANTES             | 7.7 (±0.2)                                           | 10.2 (±0.8)      |
| TGF-alpha          | 142.2 (±13.4)                                        | 153.5 (±17.9)    |
| TNFalpha           | 5.2 (±0.8)                                           | 9.5 (±1.6)       |
| TNFbeta            | <LOD                                                 | <LOD             |
| VEGF               | 169 (±55.4)                                          | 195.1 (±64.3)    |

<sup>a</sup>Mean human cytokine/chemokine levels (pg/ml ± standard error mean). <sup>b</sup>Human cytokine/chemokine

levels >10 pg/ml and >1.5 fold control levels are highlighted in blue. LOD: limit of detection (3.2

pg/ml). Cells were isolated from two human lung implants (3 wells per condition/lung implant, represents one experiment).

**Supplementary Table 2: BLT-L human lung implant immune cell production of human cytokines and chemokines following *ex vivo* LPS and PMA/ionomycin stimulation**

| Cytokine/chemokine | Human cytokine/chemokine levels (pg/ml) <sup>a</sup> |                |                |
|--------------------|------------------------------------------------------|----------------|----------------|
|                    | Control                                              | LPS            | PMA/ionomycin  |
| sCD40L             | 6.4 (±3.2)                                           | 6.4 (±3.2)     | 41 (±7.5)      |
| Eotaxin            | 8.8 (±1.7)                                           | 10 (±1.5)      | 8.6 (±0.7)     |
| FGF-2              | 24.7 (±0.8)                                          | 21.8 (±0.3)    | 25.8 (±3.8)    |
| Flt-3L             | 12.7 (±0.1)                                          | 13.4 (±2.2)    | 13.1 (±1.6)    |
| Fractalkine        | 56.8 (±5.0)                                          | 54.6 (±15.8)   | 61.3 (±4.8)    |
| G-CSF              | 45.2 (±12.0)                                         | 58 (±10.4)     | 33.1 (±5.1)    |
| GM-CSF             | 9.1 (±5.1)                                           | 13.8 (±6.2)    | 175.2 (±36.6)  |
| GRO                | 889 (±213)                                           | 1,150 (±166.3) | 961.3 (±215.5) |
| IFN-alpha2         | 12 (±0.3)                                            | 11.7 (±1.3)    | 11.6 (±1.3)    |
| IFN-gamma          | 4.6 (±1.4)                                           | 5.7 (±2.1)     | 1,579 (±262.6) |
| IL-1alpha          | 3.8 (±0.6)                                           | 5.3 (±2.1)     | 3.9 (±0.4)     |
| IL-1beta           | 59.6 (±43.8)                                         | 161.9 (±116.2) | 190.6 (±52.2)  |
| IL-1RA             | 17.3 (±1.2)                                          | 20.4 (±8.2)    | 48.3 (±9.9)    |
| IL-2               | <LOD                                                 | <LOD           | 892.3 (±185.5) |
| IL-3               | <LOD                                                 | <LOD           | <LOD           |
| IL-4               | 17 (±10.6)                                           | 15.4 (±12.2)   | 21.8 (±9.7)    |
| IL-5               | <LOD                                                 | <LOD           | <LOD           |
| IL-6               | 964.7 (±322.5)                                       | 1,552 (±490.2) | 236.3 (±55.0)  |
| IL-7               | 18.6 (±6.8)                                          | 19.9 (±7.6)    | 14.5 (±2.2)    |
| IL-8               | 5,895 (±2,866)                                       | 6,285 (±1,441) | 3,876 (±1,205) |
| IL-9               | <LOD                                                 | <LOD           | 4.6 (±0.8)     |
| IL-10              | 53.1 (±23.4)                                         | 87.6 (±28.3)   | 139.6 (±26.2)  |
| IL-12p40           | 5.4 (±2.2)                                           | 7.4 (±2.0)     | 4.8 (±0.1)     |
| IL-12p70           | <LOD                                                 | <LOD           | <LOD           |
| IL-13              | 4.9 (±1.7)                                           | 4.2 (±1.0)     | 75.6 (±9.2)    |
| IL-15              | <LOD                                                 | 3.4 (±0.2)     | <LOD           |
| IL-17A             | <LOD                                                 | <LOD           | 374 (±33.4)    |
| IP-10              | 259.1 (±115.6)                                       | 327.2 (±106.1) | 74.3 (±13.3)   |
| MCP-1              | 288.8 (±85.1)                                        | 398.7 (±70.7)  | 108.4 (±10.7)  |
| MCP-3              | 8.4 (±0.3)                                           | 10.7 (±0.2)    | 8 (±1.5)       |
| MDC                | 10.7 (±2.2)                                          | 12.3 (±0.6)    | 10.5 (±1.3)    |
| MIP-1alpha         | 1,979 (±841.8)                                       | 3,471 (±1,649) | 2,039 (±597.9) |
| MIP-1beta          | 1,250 (±447.8)                                       | 1,547 (±520.2) | 1,526 (±163.1) |
| PDGF-AA            | <LOD                                                 | <LOD           | <LOD           |
| PDGF-AB/BB         | 6.9 (±2.8)                                           | 5.9 (±0.9)     | 5.3 (±1.2)     |
| RANTES             | 124.9 (±54.1)                                        | 132.7 (±49.4)  | 551.1 (±114.3) |
| TGF-alpha          | <LOD                                                 | <LOD           | <LOD           |
| TNFalpha           | 1,260 (±386.2)                                       | 1,915 (±450.6) | 2,643 (±396.0) |
| TNFbeta            | <LOD                                                 | <LOD           | <LOD           |
| VEGF               | 18.4 (±4.2)                                          | 15.4 (±6.0)    | 23.6 (±5.0)    |

<sup>a</sup>Mean human cytokine/chemokine levels in control, LPS, and PMA/ionomycin wells (pg/ml ± standard error mean). Human cytokine/chemokine levels >10 pg/ml and >1.5 fold control levels are highlighted in blue or yellow for cells stimulated with LPS or PMA/ionomycin respectively. LOD: limit of detection (3.2 pg/ml). MNC were isolated from BLT-L mouse human lung implants (n=6 mice and 12 lung implants, represents two experiments).

**Supplementary Table 3: HLA class I haplotypes of BLT-L mice utilized for T cell immune analysis**

| Donor | HLA Class I Alleles |       |       |       |       |       |
|-------|---------------------|-------|-------|-------|-------|-------|
|       | A                   | A     | B     | B     | C     | C     |
| A     | 23:01               | 31:01 | 35:03 | 38:01 | 04:01 | 12:03 |
| B     | 03:01               | 11:01 | 07:02 | 35:01 | 04:01 | 07:02 |
| C     | 02:06               | 11:01 | 35:01 | 39:05 | 04:01 | 07:02 |
| D     | 03:01               | 24:02 | 07:02 | 44:02 | 07:02 | 16:04 |
| E     | 02:05               | 29:02 | 44:03 | 58:01 | 07:18 | 16:01 |
| F     | 01:01               | 01:01 | 08:01 | 08:01 | 07:01 | 07:01 |
| G     | 01:01               | 32:01 | 18:01 | 35:08 | 04:01 | 07:02 |
| H     | 01:01               | 02:01 | 41:02 | 57:01 | 06:02 | 07:03 |
| I     | 02:02               | 33:03 | 15:10 | 15:16 | 03:04 | 14:12 |
| J     | 02:01               | 36:01 | 08:01 | 15:03 | 02:10 | 07:01 |

**Supplementary Table 4: Detection of HCMV-specific immunity in BLT-L mice exposed to a single inoculation of HCMV.**

| Mouse    | Donor | Virus    | Days Post-Exposure | At Time of Necropsy            |             |              |
|----------|-------|----------|--------------------|--------------------------------|-------------|--------------|
|          |       |          |                    | HCMV-Specific Immune Response  |             |              |
|          |       |          |                    | T Cell Reactivity <sup>a</sup> |             | Antibody IgM |
| BLT-L11  | B     | TB40/E   | 12                 | Not detected (P)               |             | Not detected |
| BLT-L12  | B     | TB40/E   | 12                 | Positive (P)                   | 0.13-0.44%  | Not detected |
| BLT-L13  | B     | TB40/E   | 12                 | Not detected (P)               |             | Not detected |
| BLT-L14  | B     | TB40/E   | 12                 | Not detected (P)               |             | Not detected |
| BLT-L15  | I     | TB40/E   | 12                 | Not detected (I)               |             | Not detected |
| BLT-L16  | I     | TB40/E   | 12                 | Not detected (I)               |             | Not detected |
| BLT-L17  | I     | TB40/E   | 12                 | Positive (I)                   | 0.07%       | Not detected |
| BLT-L 1  | A     | TB40/E   | 14                 | Positive (E)                   | 191 SFU     | Not detected |
| BLT-L 2  | B     | TB40/E   | 21                 | Not detected (P)               |             | Not detected |
| BLT-L 3  | B     | TB40/E   | 21                 | Positive (P)                   | 0.10%       | Not detected |
| BLT-L 4  | B     | TB40/E   | 21                 | Positive (P)                   | 0.17%       | Positive     |
| BLT-L 5  | C     | TB40/E   | 34                 | Positive (E)                   | 73-160 SFU  | Positive     |
| BLT-L 6  | A     | TB40/E   | 34                 | Positive (E)                   | 395 SFU     | Positive     |
| BLT-L 7  | C     | TB40/E   | 39                 | Not detected (E)               |             | Not detected |
| BLT-L 8  | A     | TB40/E   | 125                | Positive (I)                   | 0.04%       | Not detected |
| BLT-L 9  | C     | ADrUL131 | 34                 | Positive (E)                   | 293-459 SFU | Positive     |
| BLT-L 10 | C     | ADrUL131 | 48                 | Not detected (E)               |             | Not detected |
| BLT-L55  | A     | AD169    | 14                 | Not detected (E)               |             | Not detected |
| BLT-L56  | J     | AD169    | 15                 | Positive (E)                   | 254-296 SFU | Not detected |
| BLT-L57  | J     | AD169    | 28                 | Not detected (E, P)            |             | Positive     |
| BLT-L58  | A     | AD169    | 34                 | Positive (E)                   | 575-789 SFU | Not detected |
| BLT-L59  | A     | AD169    | 47                 | Not detected (E, I)            |             | Positive     |
| BLT-L60  | J     | AD169    | 56                 | Not detected (E, P)            |             | Not detected |
| BLT-L61  | J     | AD169    | 75                 | Not detected (I)               |             | Positive     |
| BLT-L62  | A     | AD169    | 110                | Not detected (I)               |             | Positive     |

<sup>a</sup>Assay detecting HCMV-specific T cell reactivity: ELISpot (E), intracellular cytokine staining (I),

Pentamer staining (P). The magnitude of T cell reactivity is provided as the number of IFN- $\gamma$  spot forming units (SFU), % IFN- $\gamma$  and CD107a double positive, or % pentamer positive (or ranges, in case > 1 positive) for ELISpot, intracellular cytokine staining, and pentamer staining respectively.

Criteria for T cell assay positivity is detailed in Methods. Positivity threshold for Antibody IgM Index is  $\geq 0.5$ .

**Supplementary Table 5: Detection of *ex vivo* HCMV-specific T cells by IFN- $\gamma$  ELISpot in BLT-L mice exposed to a single inoculation of HCMV.**

| Fig. | Mouse   | Donor | Organ  | CMV Antigen             | Virus  | Cell #            | Mock <sup>1</sup> | Antigen <sup>1</sup> | CD45(%) <sup>2</sup> | CD3(%) <sup>2</sup> | SFU/10 <sup>6</sup><br>CD3 T cells <sup>3</sup> |
|------|---------|-------|--------|-------------------------|--------|-------------------|-------------------|----------------------|----------------------|---------------------|-------------------------------------------------|
| 4e   | BLT-L5  | C     | Liver  | pp65 <sub>495-504</sub> | TB40\E | 3×10 <sup>5</sup> | 4.3               | 20.0                 | 75.1                 | 94.8                | 73.0                                            |
| 4e   | BLT-L9  | C     | Liver  | pp65 <sub>495-504</sub> | TB40\E | 3×10 <sup>5</sup> | 4.5               | 96.8                 | 78.9                 | 97.0                | 402.1                                           |
| 4e   | BLT-L5  | C     | Liver  | pp65 <sub>123-131</sub> | TB40\E | 3×10 <sup>5</sup> | 4.3               | 22.5                 | 75.1                 | 94.8                | 84.6                                            |
| 4e   | BLT-L9  | C     | Liver  | pp65 <sub>123-131</sub> | TB40\E | 3×10 <sup>5</sup> | 4.5               | 71.8                 | 78.9                 | 97.0                | 293.2                                           |
| 4f   | BLT-L1  | A     | Liver  | IE1 <sup>4</sup>        | TB40\E | 3×10 <sup>5</sup> | 32.5              | 78.8                 | 91.7                 | 88.0                | 191.6                                           |
| 4f   | BLT-L5  | C     | Liver  | IE1 <sup>4</sup>        | TB40\E | 3×10 <sup>5</sup> | 4.3               | 38.5                 | 75.1                 | 94.8                | 159.4                                           |
| 4f   | BLT-L6  | A     | Liver  | IE1 <sup>4</sup>        | TB40\E | 3×10 <sup>5</sup> | 69.2              | 139.0                | 92.1                 | 84.8                | 296.2                                           |
| 4f   | BLT-L9  | C     | Liver  | IE1 <sup>4</sup>        | TB40\E | 3×10 <sup>5</sup> | 4.5               | 109.8                | 78.9                 | 97.0                | 458.6                                           |
| 4f   | BLT-L58 | A     | Liver  | IE1 <sup>4</sup>        | AD169  | 2×10 <sup>5</sup> | 70.0              | 180.4                | 90.3                 | 77.5                | 783.3                                           |
| 4g   | BLT-L6  | A     | M Lung | IE1 <sup>4</sup>        | TB40\E | 3×10 <sup>5</sup> | 42.0              | 85.0                 | 80.9                 | 69.6                | 255.7                                           |
| 4g   | BLT-L9  | C     | M Lung | IE1 <sup>4</sup>        | TB40\E | 3×10 <sup>5</sup> | 5.0               | 38.2                 | 98.7                 | 96.0                | 116.1                                           |
| 4g   | BLT-L56 | J     | M Lung | IE1 <sup>4</sup>        | AD169  | 3×10 <sup>5</sup> | 44.0              | 109.0                | 84                   | 65.3                | 394.1                                           |
| 4g   | BLT-L58 | A     | M Lung | IE1 <sup>4</sup>        | AD169  | 2×10 <sup>5</sup> | 54.8              | 120.0                | 79.1                 | 71.7                | 571.0                                           |

<sup>1</sup>Average IFN- $\gamma$  spot forming units (SFU) of 4 replicate wells. <sup>2</sup>Cell subset frequencies determined by flow cytometric analysis. CD45: %CD45<sup>+</sup> of live cells. CD3: %CD3<sup>+</sup> of live CD45<sup>+</sup> cells. <sup>3</sup>SFU/10<sup>6</sup> CD3 T cell = ((average of peptide-pulsed wells – average of mock-wells) × (100/%CD45) × (100/%CD3)) × (10<sup>6</sup>/input cells). <sup>4</sup>IE1 peptide pool. Positive T cell responses were defined as those > 50 SFU/million CD3 T cells and  $\geq 2\times$  mean of negative control wells.

**Supplementary Table 6: Detection of HCMV-DNA in BLT-L mice exposed to a single inoculation of HCMV.**

| Mouse    | Donor | Virus    | Time (days) | At Time of Necropsy                          |         |    |     |    |    |     |       |    |
|----------|-------|----------|-------------|----------------------------------------------|---------|----|-----|----|----|-----|-------|----|
|          |       |          |             | PCR Detection of HCMV-DNA (+/-) <sup>a</sup> |         |    |     |    |    |     |       |    |
|          |       |          |             | H LNG 1                                      | H LNG 2 | BM | SPL | LN | TO | LIV | M LNG | PB |
| BLT-L11  | B     | TB40/E   | 12          | +                                            | +       | -  | -   | -  | +  | -   | -     | -  |
| BLT-L12  | B     | TB40/E   | 12          | +                                            | +       | -  | -   | -  | -  | -   | -     | -  |
| BLT-L13  | B     | TB40/E   | 12          | +                                            | +       | -  | -   | -  | -  | -   | -     | -  |
| BLT-L14  | B     | TB40/E   | 12          | +                                            | +       | -  | -   | -  | -  | -   | -     | -  |
| BLT-L15  | I     | TB40/E   | 12          | +                                            | +       | -  | -   | -  | -  | -   | -     | ND |
| BLT-L16  | I     | TB40/E   | 12          | +                                            | +       | -  | -   | -  | -  | -   | -     | ND |
| BLT-L17  | I     | TB40/E   | 12          | +                                            | +       | -  | -   | -  | -  | -   | -     | ND |
| BLT-L 1  | A     | TB40/E   | 14          | +                                            | +       | -  | +   | +  | -  | ND  | ND    | -  |
| BLT-L 2  | B     | TB40/E   | 21          | -                                            | +       | -  | -   | -  | -  | -   | -     | -  |
| BLT-L 3  | B     | TB40/E   | 21          | -                                            | +       | -  | -   | -  | -  | -   | -     | -  |
| BLT-L 4  | B     | TB40/E   | 21          | +                                            | +       | -  | -   | -  | -  | -   | -     | -  |
| BLT-L 5  | C     | TB40/E   | 34          | -                                            | ND      | -  | -   | -  | -  | -   | -     | ND |
| BLT-L 6  | A     | TB40/E   | 34          | +                                            | -       | +  | -   | +  | -  | -   | +     | -  |
| BLT-L 7  | C     | TB40/E   | 39          | -                                            | -       | -  | -   | -  | -  | -   | -     | ND |
| BLT-L 8  | A     | TB40/E   | 125         | -                                            | -       | -  | -   | -  | -  | -   | -     | -  |
| BLT-L 9  | C     | ADrUL131 | 34          | +                                            | ND      | -  | -   | -  | -  | -   | -     | ND |
| BLT-L 10 | C     | ADrUL131 | 48          | -                                            | -       | -  | -   | -  | -  | -   | -     | ND |
| BLT-L55  | A     | AD169    | 14          | +                                            | -       | -  | +   | ND | -  | +   | +     | ND |
| BLT-L56  | J     | AD169    | 15          | -                                            | -       | -  | -   | -  | -  | -   | -     | ND |
| BLT-L57  | J     | AD169    | 28          | -                                            | -       | -  | -   | -  | -  | -   | +     | ND |
| BLT-L58  | A     | AD169    | 34          | +                                            | +       | -  | -   | -  | -  | -   | -     | ND |
| BLT-L59  | A     | AD169    | 47          | -                                            | -       | -  | -   | -  | -  | -   | -     | ND |
| BLT-L60  | J     | AD169    | 56          | ND                                           | -       | -  | -   | +  | -  | -   | +     | ND |
| BLT-L61  | J     | AD169    | 75          | ND                                           | ND      | ND | ND  | ND | ND | ND  | ND    | ND |
| BLT-L62  | A     | AD169    | 110         | ND                                           | ND      | ND | ND  | ND | ND | ND  | ND    | ND |

<sup>a</sup>Real-time PCR analysis of tissue cells and peripheral blood (PB) for HCMV-DNA: human lung (H

LNG;  $6 \times 10^4$ - $5 \times 10^6$  cells), bone marrow (BM;  $1$ - $4 \times 10^6$  cells), spleen, (SPL;  $1 \times 10^5$ - $4 \times 10^6$  cells), lymph node (LN;  $5 \times 10^4$ - $1.3 \times 10^6$  cells), thymic organoid (TO;  $1.7 \times 10^5$ - $4 \times 10^6$  cells), liver (LIV;  $5 \times 10^4$ - $4 \times 10^6$  cells), mouse lung (M LNG;  $5 \times 10^4$ - $2.3 \times 10^6$  cells) and PB (50-100  $\mu$ l). ND: not determined.

**Supplementary Table 7: Detection of HCMV-specific immunity in BLT-L mice exposed to multiple doses of HCMV-TB40/E.**

| Mouse   | Donor | Virus inoculations | At Time of Necropsy            |              |              |              |
|---------|-------|--------------------|--------------------------------|--------------|--------------|--------------|
|         |       |                    | HCMV-specific Immune Response  |              |              |              |
|         |       |                    | T cell reactivity <sup>a</sup> |              | Antibody IgM | Antibody IgG |
| BLT-L27 | D     | 3                  | Positive (I)                   | 0.40%        | Positive     | Positive     |
| BLT-L28 | D     | 3                  | Not detected (I)               |              | ND           | ND           |
| BLT-L29 | D     | 3                  | Positive (P)                   | 1.75%        | Positive     | Positive     |
| BLT-L30 | D     | 3                  | Not detected (I,P)             |              | Positive     | Positive     |
| BLT-L31 | E     | 3                  | Positive (I)                   | 0.14%        | Positive     | Positive     |
| BLT-L32 | E     | 3                  | Positive (I)                   | 0.57%        | Positive     | Positive     |
| BLT-L33 | E     | 3                  | Not detected (I)               |              | Positive     | Positive     |
| BLT-L34 | F     | 3                  | Not detected (I)               |              | Positive     | Not detected |
| BLT-L35 | F     | 3                  | Not detected (I)               |              | Positive     | Not detected |
| BLT-L36 | F     | 3                  | Not detected (I)               |              | Positive     | Not detected |
| BLT-L37 | F     | 3                  | Not detected (I)               |              | Positive     | Not detected |
| BLT-L38 | G     | 4                  | Positive (I,P)                 | 0.13%, 0.13% | Positive     | Positive     |
| BLT-L39 | H     | 4                  | Positive (P)                   | 0.17%        | ND           | ND           |
| BLT-L40 | H     | 4                  | Positive (P)                   | 0.07%        | ND           | ND           |

<sup>a</sup>Assay detecting HCMV-specific T cell reactivity: intracellular cytokine staining (I), Pentamer staining

(P). The magnitude of T cell reactivity is provided as the % IFN- $\gamma$  and CD107a double positive or % pentamer positive (or ranges, in case > 1 positive) for intracellular cytokine and pentamer staining respectively. ND: not determined. Criteria for T cell assay positivity is detailed in Methods. Positivity threshold for Antibody IgM Index  $\geq 0.5$  and IgG Index  $\geq 0.02$ .

**Supplementary Table 8: Detection of HCMV-specific immunity in BLT-L mice exposed to multiple doses of HCMV-AD169.**

| Mouse   | Donor | Virus inoculations | At Time of Necropsy            |              |              |              |
|---------|-------|--------------------|--------------------------------|--------------|--------------|--------------|
|         |       |                    | HCMV-specific Immune Response  |              |              |              |
|         |       |                    | T cell reactivity <sup>a</sup> |              | Antibody IgM | Antibody IgG |
| BLT-L41 | E     | 3                  | Not detected (I)               |              | Positive     | Positive     |
| BLT-L42 | E     | 3                  | Positive (I)                   | 0.35%        | Positive     | Positive     |
| BLT-L43 | E     | 3                  | Positive (I)                   | 0.10%        | Positive     | Positive     |
| BLT-L44 | G     | 4                  | Positive (I)                   | 0.26%        | Positive     | Positive     |
| BLT-L45 | G     | 4                  | Positive (I)                   | 0.16%        | Not detected | ND           |
| BLT-L46 | G     | 4                  | Positive (I,P)                 | 0.49, 0.02%  | Positive     | Not detected |
| BLT-L47 | G     | 4                  | Positive (I)                   | 0.32%        | Positive     | Positive     |
| BLT-L48 | G     | 4                  | Positive (I)                   | 0.16%        | Positive     | Positive     |
| BLT-L49 | G     | 4                  | Positive (I)                   | 0.62%        | Positive     | Positive     |
| BLT-L50 | G     | 4                  | Positive (I)                   | 0.06%        | Positive     | Positive     |
| BLT-L51 | H     | 4                  | Positive (P)                   | 1.91%        | ND           | ND           |
| BLT-L52 | H     | 4                  | Positive (I <sup>b</sup> ,P)   | 0.05%, 0.08% | ND           | ND           |
| BLT-L53 | H     | 4                  | Positive (I) <sup>b</sup>      | 0.44%        | ND           | ND           |
| BLT-L54 | H     | 4                  | Positive (I,P)                 | 0.20%        | ND           | ND           |
| BLT-L63 | D     | 3                  | Not detected (I)               |              | Positive     | Positive     |
| BLT-L64 | D     | 3                  | Positive (I)                   | 0.26%        | Not detected | ND           |
| BLT-L65 | D     | 3                  | Not detected (I,P)             |              | Positive     | Not detected |

<sup>a</sup>Assay detecting HCMV-specific T cell reactivity: intracellular cytokine staining (I), Pentamer staining (P) with magnitude (or ranges, in case > 1 positive) provided. The magnitude of T cell reactivity is provided as the % IFN- $\gamma$  and CD107a double positive or % pentamer positive (or ranges, in case > 1 positive) for intracellular cytokine and pentamer staining respectively. ND: Not determined. <sup>b</sup>ICS HCMV-specific CD4<sup>+</sup> T cell response. The magnitude of T cell reactivity is provided as the % IFN- $\gamma$  and TNF- $\alpha$  double positive by intracellular cytokine staining. Criteria for T cell assay positivity is detailed in Methods. Positivity threshold for Antibody IgM Index is  $\geq 0.5$ .

**Supplementary Table 9: Detection of HCMV-DNA in BLT-L mice exposed to multiple doses of HCMV-TB40/E.**

| Mouse   | Donor | Virus inoculations | At Time of Necropsy                          |         |    |     |    |    |     |       |    |
|---------|-------|--------------------|----------------------------------------------|---------|----|-----|----|----|-----|-------|----|
|         |       |                    | PCR Detection of HCMV-DNA (+/-) <sup>a</sup> |         |    |     |    |    |     |       |    |
|         |       |                    | H LNG 1                                      | H LNG 2 | BM | SPL | LN | TO | LIV | M LNG | PB |
| BLT-L27 | D     | 3                  | -                                            | -       | -  | -   | -  | -  | -   | -     | ND |
| BLT-L28 | D     | 3                  | +                                            | +       | -  | +   | -  | -  | -   | -     | ND |
| BLT-L29 | D     | 3                  | -                                            | -       | -  | -   | -  | -  | -   | -     | ND |
| BLT-L30 | D     | 3                  | -                                            | -       | -  | -   | -  | -  | +   | -     | ND |
| BLT-L31 | E     | 3                  | +                                            | -       | -  | -   | -  | -  | -   | -     | -  |
| BLT-L32 | E     | 3                  | -                                            | -       | -  | -   | -  | -  | -   | -     | -  |
| BLT-L33 | E     | 3                  | -                                            | -       | -  | -   | -  | -  | -   | -     | -  |
| BLT-L34 | F     | 3                  | ND                                           | ND      | ND | ND  | ND | ND | ND  | ND    | ND |
| BLT-L35 | F     | 3                  | ND                                           | ND      | ND | ND  | ND | ND | ND  | ND    | ND |
| BLT-L36 | F     | 3                  | ND                                           | ND      | ND | ND  | ND | ND | ND  | ND    | ND |
| BLT-L37 | F     | 3                  | ND                                           | ND      | ND | ND  | ND | ND | ND  | ND    | ND |
| BLT-L38 | G     | 4                  | -                                            | -       | -  | -   | -  | -  | -   | -     | -  |
| BLT-L39 | H     | 4                  | ND                                           | ND      | ND | ND  | ND | ND | ND  | ND    | ND |
| BLT-L40 | H     | 4                  | ND                                           | ND      | ND | ND  | ND | ND | ND  | ND    | ND |

<sup>a</sup>Real-time PCR analysis of tissue cells and peripheral blood (PB) or HCMV-DNA: human lung (H

LNG;  $1 \times 10^5$ - $1 \times 10^6$  cells), bone marrow (BM;  $1$ - $4 \times 10^6$  cells), spleen, (SPL;  $1$ - $4 \times 10^6$  cells), lymph node

(LN;  $1 \times 10^5$ - $1 \times 10^6$  cells), thymic organoid (TO;  $4 \times 10^6$  cells), liver (LIV;  $1 \times 10^5$ - $1 \times 10^6$  cells), mouse lung

(M LNG;  $1 \times 10^5$ - $1 \times 10^6$  cells) and PB (100  $\mu$ l). ND: not determined.

**Supplementary Table 10: Detection of HCMV-DNA in BLT-L mice exposed to multiple doses of HCMV-AD169.**

| Mouse   | Donor | Virus inoculations | At Time of Necropsy                          |         |    |     |    |    |     |       |    |  |
|---------|-------|--------------------|----------------------------------------------|---------|----|-----|----|----|-----|-------|----|--|
|         |       |                    | PCR Detection of HCMV-DNA (+/-) <sup>a</sup> |         |    |     |    |    |     |       |    |  |
|         |       |                    | H LNG 1                                      | H LNG 2 | BM | SPL | LN | TO | LIV | M LNG | PB |  |
| BLT-L41 | E     | 3                  | +                                            | -       | -  | -   | -  | -  | -   | -     | -  |  |
| BLT-L42 | E     | 3                  | +                                            | +       | -  | -   | -  | -  | -   | -     | -  |  |
| BLT-L43 | E     | 3                  | -                                            | -       | -  | -   | +  | -  | -   | -     | ND |  |
| BLT-L44 | G     | 4                  | -                                            | +       | -  | -   | -  | -  | -   | -     | -  |  |
| BLT-L45 | G     | 4                  | -                                            | -       | -  | -   | -  | -  | -   | -     | -  |  |
| BLT-L46 | G     | 4                  | -                                            | +       | -  | -   | -  | -  | -   | -     | -  |  |
| BLT-L47 | G     | 4                  | -                                            | -       | -  | -   | -  | -  | -   | -     | -  |  |
| BLT-L48 | G     | 4                  | -                                            | +       | -  | -   | -  | -  | -   | -     | -  |  |
| BLT-L49 | G     | 4                  | +                                            | -       | -  | -   | -  | -  | -   | -     | -  |  |
| BLT-L50 | G     | 4                  | +                                            | -       | -  | -   | -  | -  | -   | -     | -  |  |
| BLT-L51 | H     | 4                  | ND                                           | ND      | ND | ND  | ND | ND | ND  | ND    | ND |  |
| BLT-L52 | H     | 4                  | ND                                           | ND      | ND | ND  | ND | ND | ND  | ND    | ND |  |
| BLT-L53 | H     | 4                  | ND                                           | ND      | ND | ND  | ND | ND | ND  | ND    | ND |  |
| BLT-L54 | H     | 4                  | ND                                           | ND      | ND | ND  | ND | ND | ND  | ND    | ND |  |
| BLT-L63 | D     | 3                  | -                                            | -       | -  | -   | -  | -  | -   | -     | ND |  |
| BLT-L64 | D     | 3                  | -                                            | -       | -  | -   | -  | -  | -   | -     | ND |  |
| BLT-L65 | D     | 3                  | +                                            | -       | -  | -   | -  | -  | -   | -     | ND |  |

<sup>a</sup>Real-time PCR analysis of tissue cells and peripheral blood (PB) for HCMV-DNA: human lung (H LNG;  $1 \times 10^5$ - $1 \times 10^6$  cells), bone marrow (BM;  $1$ - $4 \times 10^6$  cells), spleen, (SPL;  $1$ - $4 \times 10^6$  cells), lymph node (LN;  $3.1 \times 10^4$ - $1.74 \times 10^6$  cells), thymic organoid (TO;  $1$ - $4 \times 10^6$  cells), liver (LIV;  $1 \times 10^5$ - $1 \times 10^6$  cells), mouse lung (M LNG;  $1 \times 10^5$ - $1 \times 10^6$  cells) and PB (50-100  $\mu$ l). ND: not determined.
