# Supplementary material
Source: PubMed Central journal article supplement (PMC7097514)
Supplement: 41587_2019_225_MOESM2_ESM.pdf [file 41587_2019_225_MOESM2_ESM.pdf]

## Reporting Summary

Nature Research wishes to improve the reproducibility of the work that we publish. This form provides structure for consistency and transparency in reporting. For further information on Nature Research policies, see [Authors & Referees](#) and the [Editorial Policy Checklist](#).

### Statistics

For all statistical analyses, confirm that the following items are present in the figure legend, table legend, main text, or Methods section.

- |                                     |                                                                                                                                                                                                                                                                                                |
|-------------------------------------|------------------------------------------------------------------------------------------------------------------------------------------------------------------------------------------------------------------------------------------------------------------------------------------------|
| n/a                                 | Confirmed                                                                                                                                                                                                                                                                                      |
| <input type="checkbox"/>            | <input checked="" type="checkbox"/> The exact sample size ( $n$ ) for each experimental group/condition, given as a discrete number and unit of measurement                                                                                                                                    |
| <input type="checkbox"/>            | <input checked="" type="checkbox"/> A statement on whether measurements were taken from distinct samples or whether the same sample was measured repeatedly                                                                                                                                    |
| <input type="checkbox"/>            | <input checked="" type="checkbox"/> The statistical test(s) used AND whether they are one- or two-sided<br><i>Only common tests should be described solely by name; describe more complex techniques in the Methods section.</i>                                                               |
| <input checked="" type="checkbox"/> | <input type="checkbox"/> A description of all covariates tested                                                                                                                                                                                                                                |
| <input checked="" type="checkbox"/> | <input type="checkbox"/> A description of any assumptions or corrections, such as tests of normality and adjustment for multiple comparisons                                                                                                                                                   |
| <input type="checkbox"/>            | <input checked="" type="checkbox"/> A full description of the statistical parameters including central tendency (e.g. means) or other basic estimates (e.g. regression coefficient) AND variation (e.g. standard deviation) or associated estimates of uncertainty (e.g. confidence intervals) |
| <input type="checkbox"/>            | <input checked="" type="checkbox"/> For null hypothesis testing, the test statistic (e.g. $F$ , $t$ , $r$ ) with confidence intervals, effect sizes, degrees of freedom and $P$ value noted<br><i>Give <math>P</math> values as exact values whenever suitable.</i>                            |
| <input checked="" type="checkbox"/> | <input type="checkbox"/> For Bayesian analysis, information on the choice of priors and Markov chain Monte Carlo settings                                                                                                                                                                      |
| <input checked="" type="checkbox"/> | <input type="checkbox"/> For hierarchical and complex designs, identification of the appropriate level for tests and full reporting of outcomes                                                                                                                                                |
| <input checked="" type="checkbox"/> | <input type="checkbox"/> Estimates of effect sizes (e.g. Cohen's $d$ , Pearson's $r$ ), indicating how they were calculated                                                                                                                                                                    |

*Our web collection on [statistics for biologists](#) contains articles on many of the points above.*

### Software and code

Policy information about [availability of computer code](#)

#### Data collection

Vevo 770 (version V3.0.0) acquisition ultrasound software, Nikon Elements BR software (version 4.30.01), Improvison's Volocity software (version 6.3), Quantitative Imaging Corp, QCapture (Version 2.81), BD FACSDiva software (version 6.1.3).

#### Data analysis

Adobe Photoshop (CS6), ImageJ software (version 1.51C), BD FACSDiva software (version 6.1.3), FlowJo software (version 10), Microsoft Excel (2016), GraphPad Prism (versions 6, 7 and 8), R (version 3.4.4) (Cufflinks (version 2.2.1), samtools (version 0.1.19), MATLAB R2017b (version 9.3.0.713579), Slicer (version 4.8.1).

For manuscripts utilizing custom algorithms or software that are central to the research but not yet described in published literature, software must be made available to editors/reviewers. We strongly encourage code deposition in a community repository (e.g. GitHub). See the Nature Research [guidelines for submitting code & software](#) for further information.

### Data

Policy information about [availability of data](#)

All manuscripts must include a [data availability statement](#). This statement should provide the following information, where applicable:

- Accession codes, unique identifiers, or web links for publicly available datasets
- A list of figures that have associated raw data
- A description of any restrictions on data availability

#### Data availability

The data generated are available from corresponding authors on reasonable request.

## Field-specific reporting

Please select the one below that is the best fit for your research. If you are not sure, read the appropriate sections before making your selection.

Life sciences       Behavioural & social sciences       Ecological, evolutionary & environmental sciences

For a reference copy of the document with all sections, see [nature.com/documents/nr-reporting-summary-flat.pdf](https://www.nature.com/documents/nr-reporting-summary-flat.pdf)

## Life sciences study design

All studies must disclose on these points even when the disclosure is negative.

|                 |                                                                                                                                                                                                                                                                                                                                                                                                                                                                                             |
|-----------------|---------------------------------------------------------------------------------------------------------------------------------------------------------------------------------------------------------------------------------------------------------------------------------------------------------------------------------------------------------------------------------------------------------------------------------------------------------------------------------------------|
| Sample size     | No statistical methods were used to predetermine sample size. At least 3 samples were used for each group, the minimum to achieve statistical significance, unless otherwise noted.                                                                                                                                                                                                                                                                                                         |
| Data exclusions | No data were excluded from analysis.                                                                                                                                                                                                                                                                                                                                                                                                                                                        |
| Replication     | HCMV-infected BLT-L mice assayed for HCMV-specific immune responses represent 10 different human tissue donors with unique HLA types. For the measurement of HCMV-specific IgM and IgG, randomly selected samples were re-run to assess intra-assay variability. All tests showed low inter- and intra-assay variability (<10% CV). Samples assayed by Elispot for IFN- $\gamma$ were run in triplicate wells (all attempts at replication were successful).                                |
| Randomization   | No randomization was used to determine how samples/animals were allocated to experimental groups or processed. Groups of mice representing the same human donor were inoculated with the same HCMV strain so that cells from multiple mice could be combined for T cell analyses if necessary.                                                                                                                                                                                              |
| Blinding        | Investigators were not blinded to group allocations or when assessing outcomes. In order to assess the HCMV-specific T cell responses elicited by BLT-L mice, information regarding the HLA type of the mouse and infecting strain were needed to ensure that the appropriate reagents (e.g. pentamers, peptides, etc) were utilized in the assays. In addition, in some instances cells were pooled from multiple HLA-matched mice to evaluate HCMV-specific T cell responses (Figure 4D). |

## Reporting for specific materials, systems and methods

We require information from authors about some types of materials, experimental systems and methods used in many studies. Here, indicate whether each material, system or method listed is relevant to your study. If you are not sure if a list item applies to your research, read the appropriate section before selecting a response.

| Materials & experimental systems    |                                                                 | Methods                             |                                                    |
|-------------------------------------|-----------------------------------------------------------------|-------------------------------------|----------------------------------------------------|
| n/a                                 | Involved in the study                                           | n/a                                 | Involved in the study                              |
| <input type="checkbox"/>            | <input checked="" type="checkbox"/> Antibodies                  | <input checked="" type="checkbox"/> | <input type="checkbox"/> ChIP-seq                  |
| <input type="checkbox"/>            | <input checked="" type="checkbox"/> Eukaryotic cell lines       | <input type="checkbox"/>            | <input checked="" type="checkbox"/> Flow cytometry |
| <input checked="" type="checkbox"/> | <input type="checkbox"/> Palaeontology                          | <input checked="" type="checkbox"/> | <input type="checkbox"/> MRI-based neuroimaging    |
| <input type="checkbox"/>            | <input checked="" type="checkbox"/> Animals and other organisms |                                     |                                                    |
| <input checked="" type="checkbox"/> | <input type="checkbox"/> Human research participants            |                                     |                                                    |
| <input checked="" type="checkbox"/> | <input type="checkbox"/> Clinical data                          |                                     |                                                    |

## Antibodies

Antibodies used

List of Antibodies:  
Antibodies were validated by the manufacturer with details in the links provided.  
Flow Cytometry:

- anti-CD3-FITC (clone HIT3a) (3ul/test) BD Biosciences Cat #555339 <https://www.biolegend.com/it-it/products/purified-anti-human-cd3-antibody-75>
- anti-CD3-AlexaFluor® 700 (clone UCHT1) (3ul/test) BioRad Cat #MCA463A700 <https://www.bio-rad-antibodies.com/monoclonal/human-cd3-antibody-ucht1-mca463.html?f=purified>
- anti-CD3-APC-R700 (clone UCHT1) (3ul/test) BD Biosciences Cat #565119 <http://www.bdbiosciences.com/us/reagents/research/antibodies-buffers/immunology-reagents/anti-human-antibodies/cell-surface-antigens/apc-r700-mouse-anti-human-cd3-ucht1-also-known-as-ucht-1-ucht-1/p/565119>
- anti-CD4-APC-H7 (clone RPA-T4) (3ul/test) BD Biosciences Cat #560158 <http://www.bdbiosciences.com/us/applications/research/t-cell-immunology/th-1-cells/surface-markers/human/apc-h7-mouse-anti-human-cd4-rpa-t4/p/560158>
- anti-CD4-BV™605 (clone RPA-T4) (3ul/test) BD Biosciences Cat #562658 <http://www.bdbiosciences.com/us/applications/research/t-cell-immunology/th-1-cells/surface-markers/human/bv605-mouse-anti-human-cd4-rpa-t4/p/562658>
- anti-CD8-PerCP (clone SK1) (3ul/test) BD Biosciences Cat #347314 <http://www.bdbiosciences.com/us/reagents/research/clinical-research---ruo-gmp/single-color-antibodies/percp-mouse-anti-human-cd8-sk1/p/347314>
- anti-CD8-APC-Cy7 (clone SK1) (3ul/test) BD Biosciences Cat #557834 <http://www.bdbiosciences.com/us/reagents/research/>

antibodies-buffers/immunology-reagents/anti-human-antibodies/cell-surface-antigens/apc-cy7-mouse-anti-human-cd8-sk1/p/557834

- anti-CD19-PE-Cy7 (clone SJ25C1) (3ul/test) BD Biosciences Cat #557835 <http://www.bdbiosciences.com/us/applications/research/clinical-research/oncology-research/blood-cell-disorders/surface-markers/human/pe-cy7-mouse-anti-human-cd19-sj25c1-also-known-as-sj25-c1/p/557835>
- anti-CD25-APC (clone 2A3) (3ul/test) BD Biosciences Cat #340938 <http://www.bdbiosciences.com/us/applications/clinical/blood-cell-disorders/asr-reagents/cd25-apc-2a3/p/340938>
- anti-CD33-PE (clone P67.6) (3ul/test) BD Biosciences Cat #340679 <https://www.bdbiosciences.com/us/applications/research/stem-cell-research/hematopoietic-stem-cell-markers/human/negative-markers/pe-mouse-anti-human-cd33-p676/p/347787>
- anti-CD45-APC (clone HI30) (3ul/test) BD Biosciences Cat #555485 <http://www.bdbiosciences.com/eu/applications/research/stem-cell-research/cancer-research/human/apc-mouse-anti-human-cd45-hi30/p/555485>
- anti-CD45-V500 (clone HI30) (3ul/test) BD Biosciences Cat #560777 <http://www.bdbiosciences.com/us/applications/research/stem-cell-research/cancer-research/human/v500-mouse-anti-human-cd45-hi30/p/560777>
- anti-CD45RO-FITC (clone UCHL1) (3ul/test) BD Biosciences Cat #555492 <http://www.bdbiosciences.com/us/applications/research/t-cell-immunology/regulatory-t-cells/surface-markers/human/fitc-mouse-anti-human-cd45ro-uchl1/p/555492>
- anti-CD69-PE (clone FN50) (3ul/test) BD Biosciences Cat #555531 <http://www.bdbiosciences.com/us/applications/research/t-cell-immunology/regulatory-t-cells/surface-markers/human/pe-mouse-anti-human-cd69-fn50-also-known-as-fn-50/p/555531>
- anti-HLA-DR-PerCP (clone L243) (3ul/test) BD Biosciences Cat #347364 <http://www.bdbiosciences.com/us/applications/research/stem-cell-research/mesenchymal-stem-cell-markers-bone-marrow/human/negative-markers/percp-mouse-anti-human-hla-dr-l243/p/347364>
- anti-CCR7 (CD197)-PE-Cy7 (clone 3D12) (3ul/test) BD Biosciences Cat #557648 <https://www.bdbiosciences.com/us/applications/research/t-cell-immunology/th-2-cells/surface-markers/human/pe-cy7-rat-anti-human-ccr7-cd197/p/557648>
- anti-CD38-APC (HB7) (3ul/test) BD Biosciences Cat #340439 <http://www.bdbiosciences.com/us/applications/research/t-cell-immunology/regulatory-t-cells/surface-markers/human/apc-mouse-anti-human-cd38-hb7/p/340439>
- anti-CD45RA-Pacific Blue (F8-11-13) (3ul/test) BioRad Cat #MCA88PB <https://www.bio-rad-antibodies.com/monoclonal/human-cd45ra-antibody-f8-11-13-mca88.html?f=purified>
- anti-CD27-PE (M-T271) (3ul/test) BD Biosciences Cat #555441 <http://www.bdbiosciences.com/us/applications/research/clinical-research/oncology-research/blood-cell-disorders/surface-markers/human/pe-mouse-anti-human-cd27-m-t271/p/555441>
- anti-CD3-BV™421 (UCHT1) (3ul/test) BD Biosciences Cat #562426 <http://www.bdbiosciences.com/us/applications/research/t-cell-immunology/th-1-cells/surface-markers/human/bv421-mouse-anti-human-cd3-ucht1-also-known-as-ucht-1-ucht-1/p/562426>
- anti-CD4-AlexaFluor®488 (clone OKT4) (2ul per test) BioLegend Cat #317420 <https://www.citeab.com/antibodies/522291-317420-alexa-fluor-488-anti-human-cd4-okt4-monoclonal>
- anti-CD4-BV™650 (clone OKT4) (1ul per test) BioLegend Cat #317436 <https://www.biolegend.com/en-us/products/brilliant-violet-650-anti-human-cd4-antibody-7786>
- anti-CD8-BV™510 (clone RPA-T8) (2ul per test) BioLegend Cat #301048 <https://www.biolegend.com/en-us/search-results/brilliant-violet-510-anti-human-cd8a-antibody-8000>
- anti-CD11c-APC (clone S-HCL-3) (2ul per test) BD Biosciences Cat #333144 <http://www.bdbiosciences.com/eu/reagents/clinical/reagents/single-antibodies/cd11c-apc-s-hcl-3/p/333144>
- anti-CD11c-PE (clone B-LY6) (2ul per test) BD Biosciences Cat #555392 <http://www.bdbiosciences.com/eu/reagents/research/antibodies-buffers/immunology-reagents/anti-human-antibodies/cell-surface-antigens/pe-mouse-anti-human-cd11c-b-ly6/p/555392>
- anti-CD14-BV™650 (clone M5E2) (2ul per test) BioLegend Cat #301836 <https://www.biolegend.com/en-us/products/brilliant-violet-650-anti-human-cd14-antibody-7819>
- anti-CD14-PerCP (clone HCD14) (2ul per test) BioLegend Cat #325632 <https://www.biolegend.com/en-us/search-results/percp-anti-human-cd14-antibody-9564>
- anti-CD16-PerCP (clone 3G8) (2ul per test) BioLegend Cat #302030 <https://www.biolegend.com/en-us/search-results/percp-anti-human-cd16-antibody-4340>
- anti-CD19-PerCP (clone HIB19) (2ul per test) BioLegend Cat #302228 <https://www.biolegend.com/en-us/products/percp-anti-human-cd19-antibody-4225>
- anti-CD56-PerCP (clone HCD56) (2ul per test) BioLegend Cat #318342 <https://www.biolegend.com/en-us/search-results/percp-anti-human-cd56-ncam-antibody-8388>
- anti-CD80-PE-Cy7 (clone L307.4) (1ul per test) BD Biosciences Cat #561135 <https://www.bdbiosciences.com/us/applications/research/b-cell-research/surface-markers/human/pe-cy7-mouse-anti-human-cd80-l3074-also-known-as-l307/p/561135>
- anti-CD83-APC (clone HB15E) (3ul per test) BD Biosciences Cat #551073 <http://www.bdbiosciences.com/us/reagents/research/antibodies-buffers/immunology-reagents/anti-human-antibodies/cell-surface-antigens/apc-mouse-anti-human-cd83-hb15e/p/551073>
- anti-CD86-PE-Cy7 (clone 2331 FUN-1) (1ul per test) BD Biosciences Cat #561128 <https://www.bdbiosciences.com/us/applications/research/t-cell-immunology/regulatory-t-cells/surface-markers/human/pe-cy7-mouse-anti-human-cd86-2331-fun-1/p/561128>
- anti-CD107a-APC (clone H4A3) (1ul per test) BioLegend Cat #328620 <https://www.biolegend.com/fr-fr/products/apc-anti-human-cd107a-lamp-1-antibody-5428>
- anti-IFN-γ-PE (clone 4S.B3) (3ul per test) BioLegend Cat #502509 <https://www.biolegend.com/en-us/products/pe-anti-human-ifn-gamma-antibody-1011>
- anti-IFN-γ-FITC (clone 4S.B3) (5ul per test) BioLegend Cat #502505 <https://www.biolegend.com/en-us/products/fitc-anti-human-ifn-gamma-antibody-1013>
- anti-TNF-α-PE\Dazzle 594 (clone Mab11) (3ul per test) BioLegend Cat #502946 <https://www.biolegend.com/en-us/search-results/pe-dazzle-594-anti-human-tnf-alpha-antibody-10268>
- anti-HLA-A,B,C-PacificBlue (clone W6/32) (3ul per test) BioLegend Cat #311418 <https://www.biolegend.com/fr-ch/products/pacific-blue-anti-human-hla-a-b-c-antibody-3336>
- anti-HLA-DR-PE-Cy7 (clone L243) (1ul per test) BioLegend Cat #307616 <https://www.biolegend.com/en-us/products/pe-cy7-anti-human-hla-dr-antibody-2862>
- Mouse IgG1k Isotype Control-Pacific Blue (MOPC-21) (3 ul per test) BD Biosciences Cat #558120 <http://www.bdbiosciences.com/us/reagents/research/antibodies-buffers/immunology-reagents/anti-human-antibodies/cell-surface->

antigens/pacific-blue-mouse-igg1-isotype-control-mopc-21/p/558120

- Mouse IgG1k Isotype Control-PE (clone MOPC-21) (3ul per test) BD Biosciences Cat #559320 <http://wwwbdbiosciences.com/us/applications/research/intracellular-flow/intracellular-antibodies-and-isotype-controls/anti-human-antibodies/pe-mouse-igg1-isotype-control-mopc-21/p/559320>
- Mouse IgG1k Isotype Control-APC (clone MOPC-21) (3ul per test) BD Biosciences Cat #555751 <http://wwwbdbiosciences.com/eu/reagents/research/antibodies-buffers/immunology-reagents/anti-human-antibodies/cell-surface-antigens/apc-mouse-igg1-isotype-control-mopc-21/p/555751>
- Mouse IgG2ak Isotype Control-FITC (clone G155-178) (3ul per test) BD Biosciences Cat #555573 <http://wwwbdbiosciences.com/us/reagents/research/antibodies-buffers/immunology-reagents/anti-human-antibodies/cell-surface-antigens/fic-mouse-igg2a-isotype-control-g155-178/p/555573>
- Mouse IgG2a Isotype Control-PerCP (clone X39) (3 ul per test) BD Biosciences Cat #349054 <https://wwwbdbiosciences.com/eu/reagents/research/clinical-research--ruo-gmp/single-color-antibodies/percp-mouse-iggsub2asub-kappa-isotype-control-x39/p/349054>
- Rat IgG2ak Isotype Control-PE-Cy7 (clone R35-95) (3ul per test) BD Biosciences Cat #557855 <http://wwwbdbiosciences.com/us/applications/research/intracellular-flow/intracellular-antibodies-and-isotype-controls/anti-human-antibodies/pe-cy7-rat-igg2a-isotype-control-r35-95/p/557855>

Immunohistochemistry (IHC)/Immunofluorescence (IF)

- anti-CC10-unconjugated (clone E-11) (IF, 1:500 dilution) Santa Cruz Biotech Cat #SC-365992 <https://www.scbt.com/scbt/product/cc10-antibody-e-11>
- anti-CD3-unconjugated (clone SP7) (IHC, 1:150 dilution) ThermoFisher Cat #MA1-90582 <https://www.thermofisher.com/antibody/product/CD3e-Antibody-clone-SP7-Monoclonal/MA1-90582>
- anti-CD4-unconjugated (clone SP35) (IHC, 1:100 dilution) Genway Biotech Cat #GWB-B38C3A (product discontinued). Positive control-human tonsil tissue.
- anti-CD8-unconjugated (clone SP16) (IHC, 1:50 dilution) Biocare Medical Cat #CRM 311 C <https://biocare.net/wp-content/uploads/PDF%20Data%20Sheets/311.pdf>
- anti-CD11c-unconjugated (clone 5D11) (IHC, 1:100 dilution) Leica Biosystems Cat #CD11C-563-L-CE <https://www.leicabiosystems.com/ihc-ish-fish/immunohistochemistry-ihc-antibodies-novocastra-reagents/primary-antibodies/products/cd11c/>
- anti-CD20-unconjugated (clone L26) (IHC, 1:100 dilution) Biocare Medical Cat #CM004C <https://biocare.net/product/cd20-antibody/>
- anti-CD34-unconjugated (clone QBEnd10) (IHC, 1:200 dilution; IF, 1:100 dilution) Agilent Cat #M716501-2 [https://www.agilent.com/store/en\\_US/Prod-M716501-2/M716501-2](https://www.agilent.com/store/en_US/Prod-M716501-2/M716501-2)
- anti-mCD34-unconjugated (clone MEC 14.7) (IHC, 1:200 dilution) Novus Biologicals Cat #NB600-1071 [https://www.novusbio.com/products/cd34-antibody-mec-147\\_nb600-1071](https://www.novusbio.com/products/cd34-antibody-mec-147_nb600-1071)
- anti-CD45-unconjugated (clones 2B11 and PD7/26) (IHC, 1:350 dilution) Agilent Cat #M070101-2 [https://www.agilent.com/store/en\\_US/Prod-M070101-2/M070101-2](https://www.agilent.com/store/en_US/Prod-M070101-2/M070101-2)
- anti-mCD45-unconjugated (clone 30-F11) (IHC, 1:200 dilution) BD Biosciences Cat #550539 <http://wwwbdbiosciences.com/us/applications/research/stem-cell-research/cancer-research/human/purified-rat-anti-mouse-cd45-30-f11/p/550539>
- anti-CD56-unconjugated (clone 123C3) (IHC, 1:50 dilution) Agilent Cat #M730429-2 [https://www.agilent.com/store/en\\_US/Prod-M730429-2/M730429-2](https://www.agilent.com/store/en_US/Prod-M730429-2/M730429-2)
- anti-CD68-unconjugated (clone KP1) (IHC, 1:200 dilution) Agilent Cat #M081401-2 [https://www.agilent.com/store/en\\_US/Prod-M081401-2/M081401-2](https://www.agilent.com/store/en_US/Prod-M081401-2/M081401-2)
- anti-Cytokeratin 19-unconjugated (clone EPR1579Y) (IHC, 1:100 dilution) Abcam Cat #ab76539 <https://www.abcam.com/cytokeratin-19-antibody-epr1579y-ab76539.html>
- anti-Cytokeratin 19-unconjugated (clone A53-B/A2) (IF, 1:100 dilution) Abcam Cat #ab7754 <https://www.abcam.com/cytokeratin-19-antibody-a53-ba2-ab7754.html>
- anti-Cytokeratin 19-unconjugated (clone KRT19) (IF, 1:500 dilution) Novus Biologicals Cat #NB100-687 [https://www.novusbio.com/products/cytokeratin-19-antibody\\_nb100-687](https://www.novusbio.com/products/cytokeratin-19-antibody_nb100-687)
- anti-mCytokeratin 19-unconjugated (clone EPNCIR127B) (IHC, 1:200 dilution) Abcam Cat #ab133496 <https://www.abcam.com/cytokeratin-19-antibody-epncir127b-ab133496.html>
- anti-Vimentin-unconjugated (clone V9) (IHC, 1:1,000 dilution, IF, 1:250 dilution) Abcam Cat #ab8069 <https://www.abcam.com/vimentin-antibody-v9-cytoskeleton-marker-ab8069.html>
- anti-HCMV Glycoprotein B-unconjugated (rabbit polyclonal) (IF, 1:500 dilution) Sino Biological Cat #10202-RP01 <https://www.sinobiological.com/CMV-gB-Antibody-g-2881.html>
- anti-HCMV IE-unconjugated (clone 6F8.2) (IHC, 1:2,000 dilution) Millipore Cat #MAB8131 [https://www.emdmillipore.com/US/en/product/Anti-Cytomegalovirus-Antibody-immediate-early-clone-6F8.2\\_MM\\_NF-MAB8131](https://www.emdmillipore.com/US/en/product/Anti-Cytomegalovirus-Antibody-immediate-early-clone-6F8.2_MM_NF-MAB8131)
- anti-HCMV IE/E-unconjugated (clones DDG9 and CCH2) (IHC, 1:200 dilution) Cell Marque Cat #213M-15-ASR <http://www.cellmarque.com/cmsial-ifu/ASR21321030.pdf>
- anti-HCMV Late-unconjugated (clone QB1/06) (IHC, 1:50 dilution) Abcam Cat #ab49211 (product discontinued). Positive control-CMV infected tissue.
- Anti-Zika NS2B-unconjugated (rabbit polyclonal) (IF, 1:50 dilution) GeneTex Cat #GTX133308 <https://www.genetex.com/Product/Detail/Zika-virus-NS2B-protein-antibody/GTX133308>
- anti-MERS-CoV nucleocapsid-unconjugated (rabbit polyclonal) (IF: 1:200 dilution) LS Bio Cat #LS-C483529 <https://www.lsbio.com/antibodies/mers-coronavirus-nucleocapsid-antibody-elisa-flow-icc-if-immunofluorescence-ihc-ip-wb-western-ls-c483529/496447>
- anti-RSV-unconjugated (goat polyclonal) (IF, 1:500 dilution) Meridian Life Science Cat #B65860G <https://meridianlifescience.com/bioSpecs/B65860G.pdf>
- anti-RSV-unconjugated (goat polyclonal) (IF, 1:500 dilution) Abcam Cat #ab20745 <https://www.abcam.com/respiratory-syncytial-virus-antibody-ab20745.html>
- anti-β-Tubulin IV-unconjugated (clone ONS.1A6) (IF, 1:500 dilution) Sigma-Aldrich Cat #T7941 <https://www.sigmaaldrich.com/catalog/product/sigma/t7941?lang=en&region=US>
- Anti-Goat IgG heavy and light chains-AlexaFlour®594 (donkey polyclonal) (1:500 dilution) Invitrogen Cat #A-11058 <https://www.thermofisher.com/antibody/product/Donkey-anti-Goat-IgG-H-L-Cross-Adsorbed-Secondary-Antibody-Polyclonal/A-11058>
- Anti-Rabbit IgG heavy and light chains-AlexaFlour®488 (goat polyclonal) (1:500 dilution) Invitrogen Cat #A-11008 <https://www.thermofisher.com/antibody/product/Donkey-anti-Rabbit-IgG-H-L-Cross-Adsorbed-Secondary-Antibody-Polyclonal/A-11008>

[www.thermofisher.com/antibody/product/A-11008.html?CID=AFLAG-A-11008](http://www.thermofisher.com/antibody/product/A-11008.html?CID=AFLAG-A-11008)

- Anti-Rabbit IgG heavy and light chains-AlexaFlour®568 (goat polyclonal) (1:500 dilution) Invitrogen Cat #A-11036 <https://www.thermofisher.com/antibody/product/Goat-anti-Rabbit-IgG-H-L-Highly-Cross-Adsorbed-Secondary-Antibody-Polyclonal/A-11036>
- Anti-Mouse IgG heavy and light chains-AlexaFlour®488 (goat polyclonal) (1:500 dilution) Invitrogen Cat #A-11001 <https://www.thermofisher.com/antibody/product/Goat-anti-Mouse-IgG-H-L-Cross-Adsorbed-Secondary-Antibody-Polyclonal/A-11001>
- Anti-Mouse IgG heavy and light chains-AlexaFlour®568 (goat polyclonal) (1:500 dilution) Invitrogen Cat #A-11004 <https://www.thermofisher.com/order/genome-database/details/antibody/A-11004.html?CID=AFLBC-A-11004>
- Anti-Mouse IgG heavy and light chains-AlexaFlour®488 (donkey polyclonal) (1:500 dilution) Invitrogen Cat #A-21202 <https://www.thermofisher.com/antibody/product/Donkey-anti-Mouse-IgG-H-L-Highly-Cross-Adsorbed-Secondary-Antibody-Polyclonal/A-21202>
- Rat IgG2ak Isotype Control-unconjugated (clone KLH/G2a-1-1) (dilution dependent on primary antibody concentration) Novus Biologicals Cat #NBP1-51104 [https://www.novusbio.com/products/igg2a-isotype-control-klh-g2a-1-1\\_nbp1-51104](https://www.novusbio.com/products/igg2a-isotype-control-klh-g2a-1-1_nbp1-51104)
- Negative control mouse IgG1k-unconjugated (clone DAK-GO1) (dilution dependent on primary antibody concentration) Agilent Cat #X093101-2 [https://www.agilent.com/store/en\\_US/Prod-X093101-2/X093101-2](https://www.agilent.com/store/en_US/Prod-X093101-2/X093101-2)
- Negative control mouse IgG2ak-unconjugated (clone DAK-GO5) (dilution dependent on primary antibody concentration) Agilent Cat #X094301-2 [https://www.agilent.com/store/en\\_US/Prod-X094301-2/X094301-2](https://www.agilent.com/store/en_US/Prod-X094301-2/X094301-2)
- Negative control rabbit Ig fraction-unconjugated (rabbit polyclonal Ig) (dilution dependent on primary antibody concentration) Agilent Cat #X090302-8 [https://www.agilent.com/store/en\\_US/Prod-X090302-8/X090302-8](https://www.agilent.com/store/en_US/Prod-X090302-8/X090302-8)

#### Validation

The specificity of the antibodies purchased from commercial sources (BD Biosciences, Biolegend, Biorad, Novus Biological, Santa Cruz Biotech, ThermoFisher, Genway Biotech, Biocare Medical, Leica Biosystems, Abcam, Sino Biological, Millipore, Cell Marque, Genetex, LS Bio, Meridian Life Sciences Invitrogen, Agilent, Sigma-Aldrich) were validated by the manufacturer as noted on their website (links provided above for each antibody).

## Eukaryotic cell lines

Policy information about [cell lines](#)

#### Cell line source(s)

Vero CCL-81, MRC-5, and ARPE-19 cells were purchased from ATCC

#### Authentication

Cell lines were authenticated by morphological identification and virus susceptibility profiles.

#### Mycoplasma contamination

Cell lines were tested negative for mycoplasma by the supplier.

#### Commonly misidentified lines (See [ICLAC](#) register)

No commonly misidentified cell lines were used

## Animals and other organisms

Policy information about [studies involving animals](#); [ARRIVE guidelines](#) recommended for reporting animal research

#### Laboratory animals

Lung-only mice (LoM) were constructed using 13-18 week old male and female NOD.Cg-Prkdcscid Il2rgtm1Wjl/SzJ mice (NSG; The Jackson Laboratory, Bar Harbor, ME) mice. BLT-Lung (BLT-L) mice were constructed using 10-15 week old male and female NSG mice.

#### Wild animals

The study did not involve wild animals.

#### Field-collected samples

The study did not involve field-collected samples.

#### Ethics oversight

Animal studies were carried out according to protocols approved by the Institutional Use and Care Committee at UNC-Chapel Hill and in adherence to the NIH Guide for the Care and Use of Laboratory Animals.

Note that full information on the approval of the study protocol must also be provided in the manuscript.

## Flow Cytometry

### Plots

Confirm that:

- The axis labels state the marker and fluorochrome used (e.g. CD4-FITC).
- The axis scales are clearly visible. Include numbers along axes only for bottom left plot of group (a 'group' is an analysis of identical markers).
- All plots are contour plots with outliers or pseudocolor plots.
- A numerical value for number of cells or percentage (with statistics) is provided.

### Methodology

#### Sample preparation

Sample preparation for the flow cytometric analysis of peripheral blood and tissues from humanized mice is detailed in the

|                           |                                                                                                                                                                                                                                                                                                                                         |
|---------------------------|-----------------------------------------------------------------------------------------------------------------------------------------------------------------------------------------------------------------------------------------------------------------------------------------------------------------------------------------|
| Sample preparation        | Materials and Methods.                                                                                                                                                                                                                                                                                                                  |
| Instrument                | Flow cytometry data was collected on BD LSRFortessa or BD FACSCanto instruments using BD FACSDiva software (version 6.1.3)                                                                                                                                                                                                              |
| Software                  | Flow cytometry data was analyzed with BDFACSDiva (version 6.1.3) or FlowJo software (version 10)                                                                                                                                                                                                                                        |
| Cell population abundance | No cell populations were sorted by flow cytometry.                                                                                                                                                                                                                                                                                      |
| Gating strategy           | For ICS and pentamer staining analyses, we first gated on singlets based on side scatter (SSC) area and height. Cell populations were gated based on their forward scatter (FSC) and SSC profiles. Gates to define positive and negative populations were defined by isotype and fluorescent minus one (FMO) controls when appropriate. |

Tick this box to confirm that a figure exemplifying the gating strategy is provided in the Supplementary Information.
